# 1                    **Claustral Projections to Anterior Cingulate Cortex Modulate** 2                    **Engagement with the External World**

3  
4 Gal Atlan<sup>1</sup>, Noa Matosevich<sup>2,\*</sup>, Noa Peretz-Rivlin<sup>1,\*</sup>, Idit Yvgi<sup>3,\*</sup>, Eden Chen<sup>1</sup>, Timna  
5 Kleinman<sup>1</sup>, Noa Bleistein<sup>1,3</sup>, Efrat Sheinbach<sup>1,3</sup>, Maya Groysman<sup>1</sup>, Yuval Nir<sup>2</sup>, Ami Citri<sup>1,3,4</sup>

6  
7 <sup>1</sup> The Edmond and Lily Safra Center for Brain Sciences, The Hebrew University of Jerusalem, Edmond  
8 J. Safra Campus, Givat Ram, Jerusalem, Israel 91904

9 <sup>2</sup> Department of Physiology & Pharmacology, Sackler School of Medicine & Sagol School of  
10 Neuroscience, Tel Aviv University, Tel Aviv 6997801, Israel

11 <sup>3</sup> Institute of Life Sciences, The Hebrew University of Jerusalem, Edmond J. Safra Campus, Givat Ram,  
12 Jerusalem, Israel 91904,

13 <sup>4</sup> Program in Child and Brain Development, Canadian Institute for Advanced Research, MaRS Centre,  
14 West Tower, 661 University Ave, Suite 505, Toronto, Ontario, Canada M5G 1M1.

15 \* These authors contributed equally and are listed in alphabetical order.

16  
17 **Corresponding author:** [ami.citri@mail.huji.ac.il](mailto:ami.citri@mail.huji.ac.il)

## 18 **Abstract:**

19 Engagement is a major determinant of performance. Hyper-engagement risks impulsivity and is  
20 fatiguing over time, while hypo-engagement could lead to missed opportunities. Even in sleep, when  
21 engagement levels are minimal, sensory responsiveness varies. Thus, maintaining an optimal  
22 engagement level with the environment is a fundamental cognitive ability. The claustrum, and in  
23 particular its reciprocal connectivity with executive regions in the frontal cortex, has been associated  
24 with salience, attention and sleep. These apparently disparate roles can be consolidated within the  
25 context of engagement. Here we describe the activity of claustrum-frontal circuits in a task imposing a  
26 tradeoff between response inhibition and sensory acuity ('ENGAGE'). Recording calcium fiber  
27 photometry during >80,000 trials, we characterize claustrum recruitment during salient behavioral  
28 events, and find that a moderate level of activity in claustrum-cingulate projections defines optimal  
29 engagement. Low activity of this pathway is associated with impulsive actions, while high activity is  
30 associated with behavioral lapses. Chemogenetic activation of cingulate-projecting claustrum neurons  
31 suppressed impulsive behavior and reduced the engagement of mice in the task. This relationship  
32 became even clearer upon addressing individual variability in the strategy mice employed during the  
33 ENGAGE task. Furthermore, this association of claustrum activity and engagement extends into sleep.  
34 Using simultaneous EEG and photometry recordings in the claustrum, we find that cingulate projecting  
35 claustrum neurons are most active during deep unresponsive slow-wave sleep, when mice are less prone  
36 to awakening by sensory stimuli.

## 37 Introduction

38 Engagement is a crucial determinant of behavior. Sensory events that are normally ignored can become  
39 highly salient, depending on attentional state and engagement with the external world. In the 2011  
40 World Championships, reigning champion and world record holder Usain Bolt committed a false start  
41 on the 100 meter final and was disqualified from the competition. It cannot be said that Bolt lacked  
42 experience or skill, as he is widely regarded as the best sprinter of all time <sup>1</sup>. In fact, his reaction time  
43 is considered slow, an indication of his confidence and natural sprinting ability <sup>2</sup>. As he was waiting for  
44 the gun to start the race, the slightest twitch of a muscle from his compatriot and eventual race winner,  
45 Yohan Blake, was arguably the trigger that sent him off prematurely. Bolt's hyper-sensitivity likely  
46 reflects his vigilant concentration and anticipation of the start signal, amplified by the high-pressure  
47 occasion.

48 In challenging tasks or under pressure, performance scales with engagement only up to a limit,  
49 following a bell-shaped curve known as the 'Yerkes Dodson' law <sup>3</sup>. Optimal performance is achieved  
50 when a balance between vigilance and caution is achieved (being "in the zone"). Hyper-engagement  
51 reduces task performance by increasing the propensity for impulse errors, while hypo-engagement  
52 ("zoning out") leads to missed opportunities. Furthermore, maintenance of heightened engagement over  
53 time eventually leads to exhaustion and lapses in attention <sup>4,5</sup>. Engagement with the external world can  
54 also be addressed in sleep, as deeper sleep is associated with a reduced propensity to be awoken by  
55 sensory stimuli <sup>6,7</sup>.

56 Prefrontal regions of the cortex, such as the anterior cingulate cortex (ACC), and the orbitofrontal cortex  
57 (OFC), have been implicated in regulating multiple attentional processes such as vigilance and impulse  
58 control, positioning them as prime candidates for modulating engagement with the external world <sup>8-11</sup>.  
59 Prefrontal cortex is heavily modulated by global arousal signals, widely attributed to the action of  
60 neuromodulators and to subcortical structures such as the thalamus and the claustrum, due to their  
61 capacity to synchronously signal to broad cortical territories <sup>12-15</sup>. In this study, we identify a role for  
62 claustral neurons projecting to the ACC in defining the degree to which mice engage with the external  
63 world.

64 The claustrum is a thin neuronal structure, enclosed between the insular cortex and the striatum in the  
65 mammalian brain <sup>15-17</sup>. It has been proposed to mediate cortical synchronicity, salience and attention  
66 <sup>15,18-22</sup> through strong claustrum-cortical feed-forward inhibition <sup>14,19,23</sup>. The most prominent connectivity  
67 of the claustrum is with prefrontal cortical structures such as the ACC and OFC <sup>24-28</sup>. Axons from these  
68 frontal regions reciprocally innervate most of the claustrum, in contrast to constrained sensory zones  
69 defined by afferents from sensory cortices <sup>26,27,29-33</sup>. Further anatomical division of the claustrum into  
70 modules is supported by its internal organization into a 'core' and 'shell', as well as by mapping of its  
71 projections <sup>24,25,32,34,35</sup>. Such modules could potentially play distinct roles in modulating executive  
72 function and sensory processing, particularly given recent studies associating claustrum activity with  
73 behavioral performance <sup>19,20,36</sup>. However, the association between claustral modules and physiology and  
74 function is yet to be clearly demonstrated <sup>37</sup>. Particularly, data regarding the response patterns of  
75 claustral populations during behavior are scarce <sup>18,36,38</sup>, and the rules governing behaviorally-relevant  
76 claustrum recruitment remain unexplored.

77 Here we employed fiber photometry from anatomically defined claustral projection networks, recording  
78 calcium transients in behaving mice. Our results demonstrate that ACC-projecting (ACCp) and OFC-  
79 projecting (OFCp) claustrum neurons form distinct modules, differing in their anatomical distribution  
80 as well as in their spontaneous activity and their recruitment during behavior. Utilizing an automated  
81 behavioral training system, we trained mice on a cognitively-engaging task ('ENGAGE'), imposing a  
82 tradeoff between response inhibition and engagement. We find that claustrum-frontal populations were  
83 recruited during the task, responding transiently to multiple salient sensory events and motor actions.  
84 Importantly, the activity of ACCp neurons, but not OFCp neurons, reflects the level to which mice

85 engage with the task. Thus, low ACCp activity corresponds to hyper-engagement, while high ACCp  
86 corresponds to disengagement. Chemogenetic elevation of the activity of ACCp neurons was sufficient  
87 to suppress impulsive responses. Furthermore, we observed that mice exhibited distinct strategies for  
88 coping with the ENGAGE task, which related to their degree of ACCp recruitment. Finally, by applying  
89 simultaneous EEG and photometry recordings, we found that the association between ACCp activity  
90 and engagement extends to sleep. Claustrum activity increased during periods of maximal slow wave  
91 activity (SWA) in NREM sleep, and correlated with the potential of a mouse to maintain its sleep in the  
92 presence of awakening tones. Taken together, our results reveal the role of a sub-network of claustral  
93 neurons projecting to the ACC in controlling engagement with the external world (Figure S1).

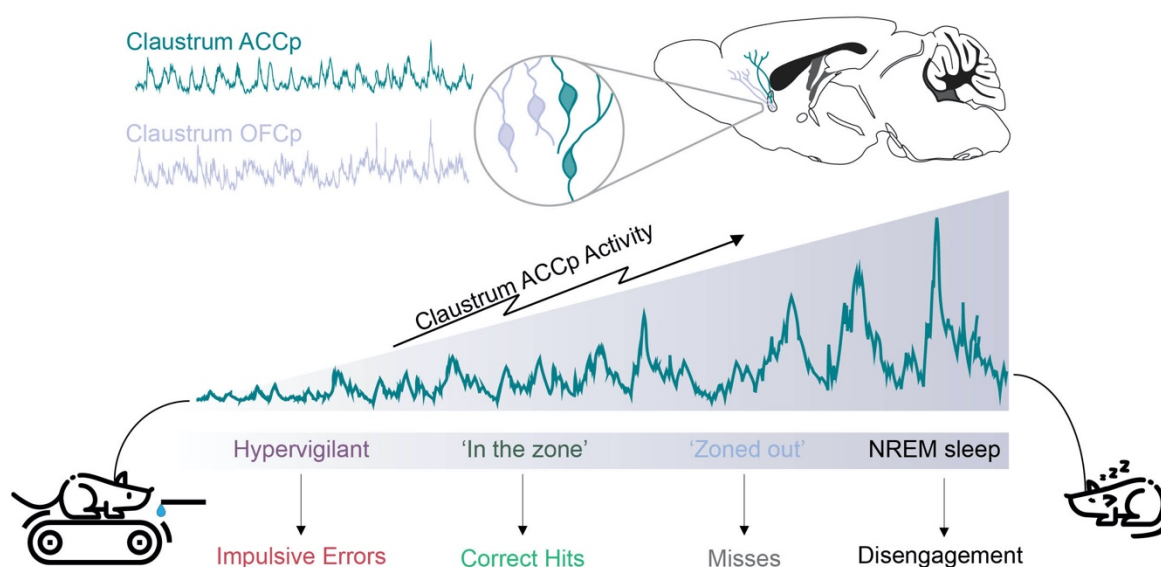

Figure S1. Increased ACCp activity is associated with reduced engagement during behavior and in sleep. Optimal ‘in the zone’ performance requires a defined, moderate, level of ACCp activity (Figures 2-4). At low ACCp activity levels, mice tend to perform impulse errors in the response to the trial onset BBN, rather than withhold their response in anticipation of the ‘go’ cue. At high ACCp activity levels, mice tend to ‘zone out’ and miss trials. Furthermore, even higher levels of ACCp activity are associated with ‘miss streaks’, in which the mice do not engage with the task over multiple minutes. Finally, during sleep, cortical slow-wave EEG is correlated with increased ACCp activity, and the propensity of mice to awake from NREM sleep following tone stimulations decreases as a function of ACCp activity (Figure 5).

94

## 95 Results

### 96 Claustral subpopulations projecting to ACC vs OFC are largely distinct

97 To investigate the functional organization of claustrum subpopulations projecting to frontal regions, we  
98 focused on two main frontal targets of the claustrum: the ACC and the OFC. Projection-based labeling  
99 of claustral neurons, enabled by retrograde-transporting Adeno Associated Viruses<sup>39</sup> (retroAAV; Figure  
100 1A, and see supplementary table T1), demonstrated that ACCp and OFCp claustrum neurons are  
101 anatomically segregated (Figure 1B, S2A), with sparse co-labeled neurons (Figure S2B). ACCp neurons  
102 are densely clustered in the claustrum core, while OFCp neurons are spread throughout the core and the  
103 shell of the claustrum (Figure 1C, S2C-D), appearing sparser in the core (Figure S2A, D). Axons of  
104 ACCp and OFCp claustral neurons exhibit differential projections to frontal targets (Figure 1D). In  
105 addition, ACCp axonal arborization was more prominent within sensory cortical areas (Figure 1E, S2E).

106 To address whether the anatomical segregation between ACCp and OFCp neurons extends also to their  
107 physiology, we employed an intersectional viral approach to record population calcium transients from  
108 ACCp or OFCp neurons in head-restrained mice running on a linear track (Figure 1F; Methods). ACCp  
109 activity exhibited less frequent but longer-lasting spontaneous calcium events in comparison to OFCp

110 (Figure 1G). We next recorded concurrently from both populations in the same animal, using dual-color  
 111 fiber photometry (Figure 1H, I). Spontaneous activity was correlated between ACCp and OFCp neurons  
 112 (Figure 1J). However, these windows of correlation were relatively short, as cross-correlations of ACCp  
 113 and OFCp activity decayed within a second (Figure 1K). Together, these results establish the ACCp  
 114 and OFCp subpopulations as partially overlapping, yet largely independent claustrum-frontal networks.

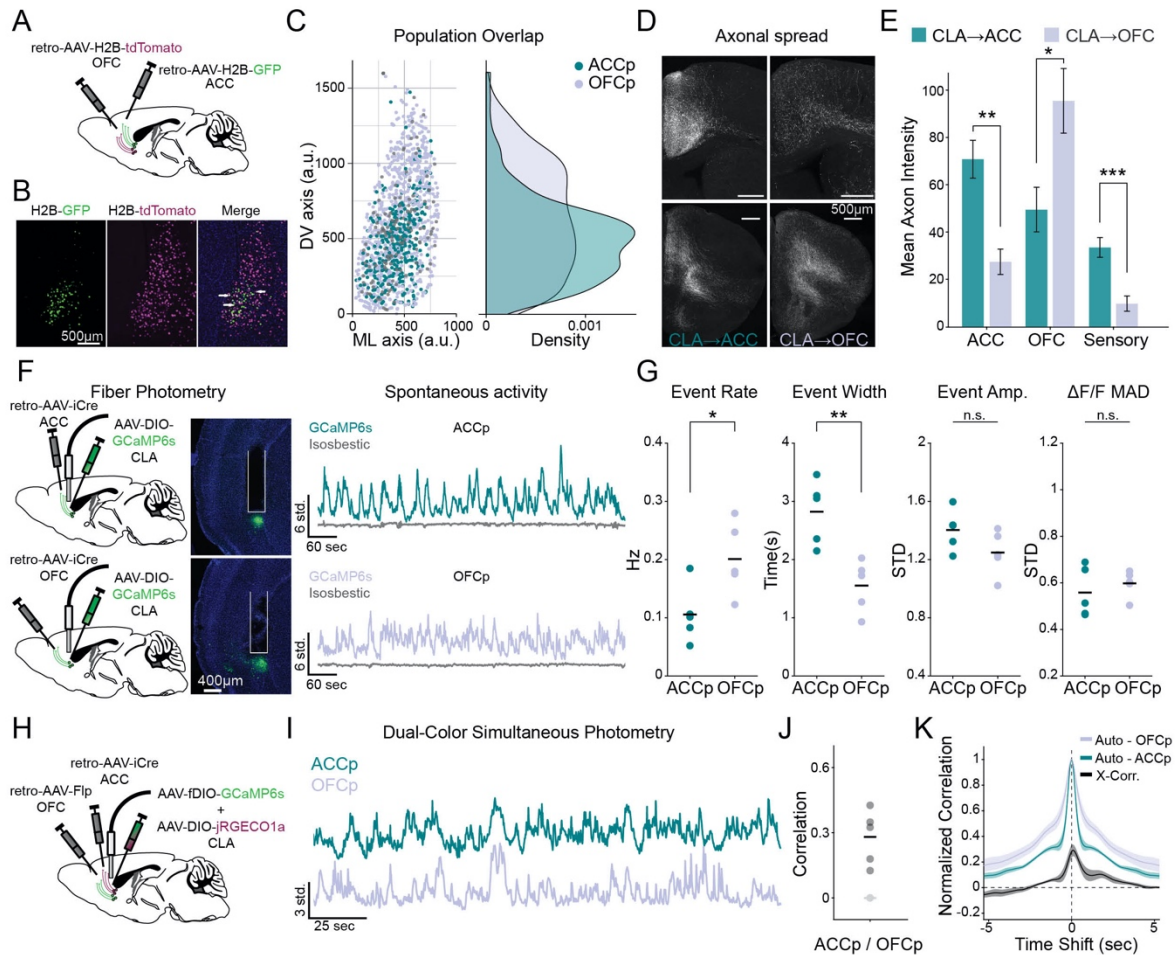

115

## 116 ACCp activity bi-directionally reflects task engagement

117 We next proceeded to investigate the recruitment and function of the ACCp and OFCp populations  
 118 during behavior. We developed ‘ENGAGE’, a novel biphasic form of a randomized cue delay task,  
 119 supporting the investigation of multiple aspects of attentive behavior, including impulsivity, sensory  
 120 detection and selection, and sustained attention<sup>40</sup>. Trial onset (initiated by the mouse during training,  
 121 or every 20s during recording sessions, see below) was indicated by a brief broadband noise (BBN),

122 followed by a randomized delay period (of 0.5-3s), during which mice were required to withhold licking  
 123 until an auditory ‘go’ cue was played. Premature (‘impulsive’) licking during this initial stage of the  
 124 task resulted in trial abortion. Timely licks (<1.5s) following the go-cue were rewarded (‘hit’). Trials in  
 125 which the mouse did not lick in a timely fashion were defined as ‘miss’ trials and were not rewarded  
 126 (Figure 2A; Methods). Trial difficulty was determined by a combination of several conditions: go-cue  
 127 tone (four intensities), a tone cloud distractor (presence, absence), and a visual aid, presented together  
 128 with the auditory go-cue (presence, absence). Conditions were randomized across trials, while

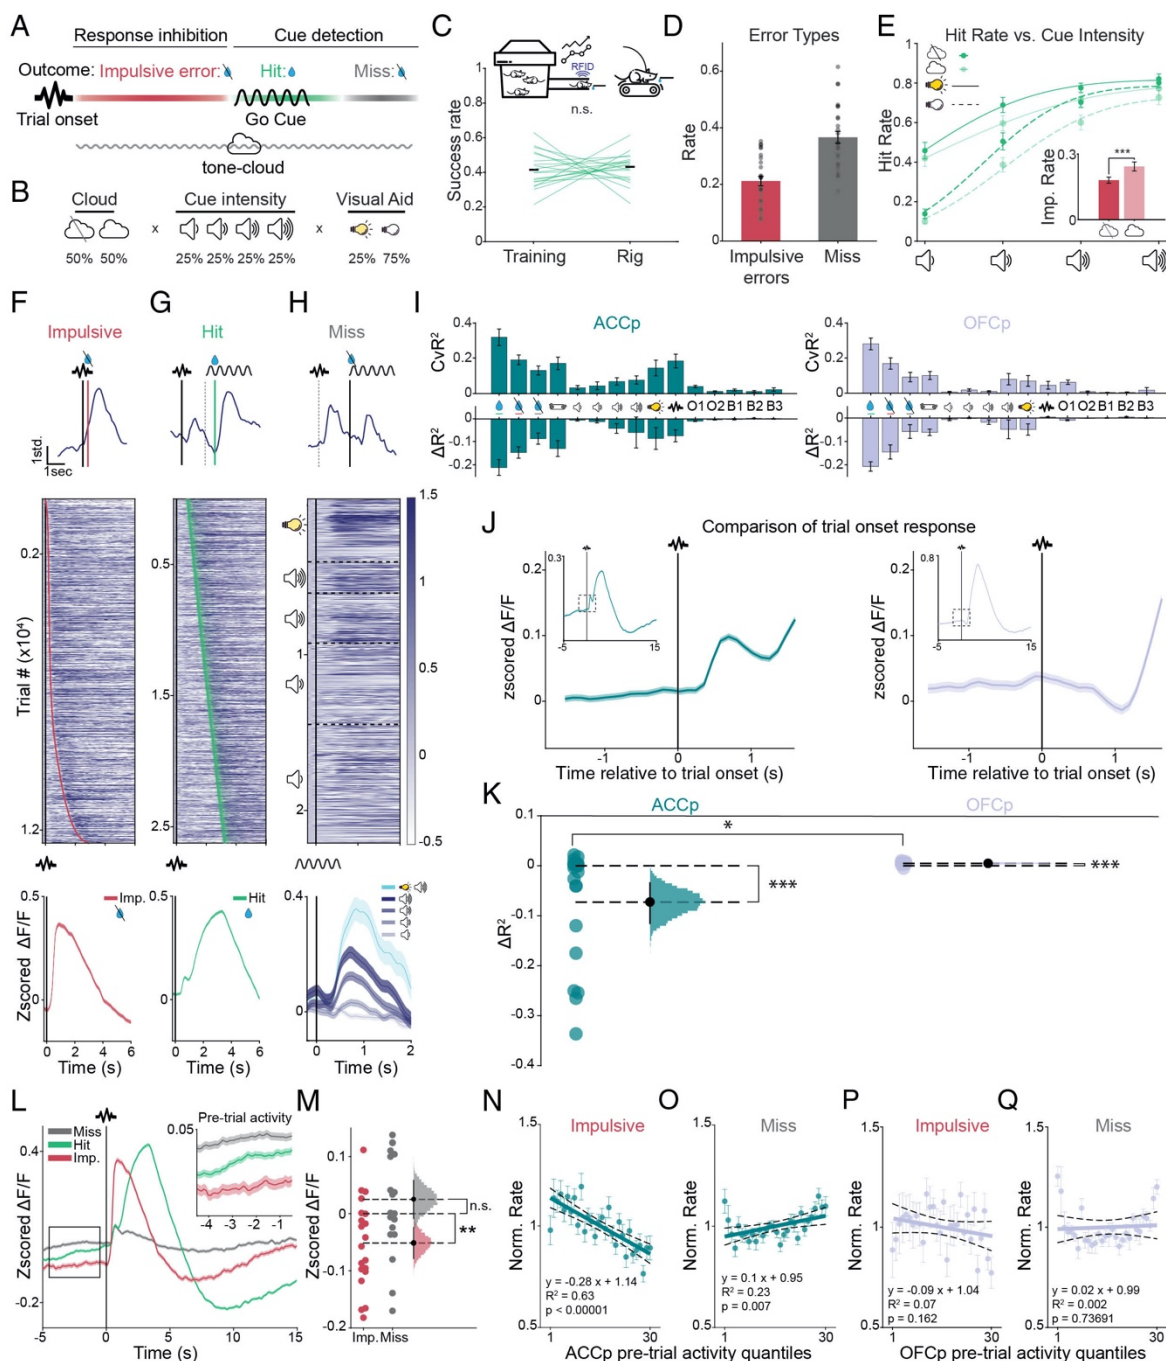

**Figure 2. Differential correlation of ACCp vs OFCp activity with trial outcome.** (A) Scheme describing the ENGAGE task. Trial onset was indicated by a 100ms broadband noise. Mice were rewarded for timely responses following Go cue initiation (‘hit’). Impulse errors were defined as licks between trial onset to the Go cue, while ‘miss’ trials included trial omissions and late licks. (B) Distribution of trial parameters. (C) Co-housed cohorts of mice (n=23 mice in 7 cages) were trained in an automated home-cage system (see Methods), allowing individualized training schemes based on RFID identification. Success rate transferred from training to subsequent head-fixed recording sessions. (D) Distribution of impulsive vs miss error rates in the task during head-fixed recording sessions. (E) Mean hit rate (excluding impulsive errors) as a function of cue intensity

during recording (~80,000 total individual trials). Inset depicts impulse errors, which increased in the presence of the tone cloud. (F-H) ACCp claustrum dynamics during impulsive (F, n=12,471), hit (G, n=26,243) and miss (H, n=23,430) trials aligned to trial onset (F-G) or cue presentation (H). Top: Single trial examples. Red and green lines indicate impulsive or correct licks, respectively. Heatmaps: all ACCp trials from n=20 mice, sorted by lick onset (impulsive); the delay from trial onset to cue (hits); or cue intensity (miss). Ticks indicate the first impulsive or correct lick within the trial, respectively. Bottom: mean activity traces in impulsive (left) hit (middle) and miss trials (right, separated by cue intensity). (I) Quantification of the contribution of behavioral events to claustrum photometry signal (n=20 ACCp channels, n=10 OFCp channels) using a linear encoding model (see Methods and supplementary table T2). CvR<sup>2</sup>: cross-validated explained variance in a single variable model compared to the full model.  $\Delta R^2$ : unique contribution of a label to the model measured by net loss in explained variance. (J) Averaged ACCp (left, n=20 channels) and OFCp (right, n=10 channels) traces around trial onset. (K) Model quantification of the representation of trial onset. Data is presented as individual mice with bootstrapped distribution of means, and 95% confidence intervals. (L) Mean activity of all ACCp recordings (n=20) aligned to trial onset, separated by trial outcome. Inset depicts pre-trial activity. (M) Mean pre-trial activity preceding impulsive (red) or miss (gray) errors (individual mice with bootstrapped distribution of means and 95% confidence intervals). (N-Q) Normalized impulsive (N,P) or miss (O,Q) error rate, as a function of pre-trial activity quantiles for AACp (N,O; n=20) or OFCp (P,Q; n=10) data. Thick line represents linear fit, dotted lines represent 95% confidence intervals. Unless noted otherwise, data are mean  $\pm$  s.e.m. \*p < 0.05, \*\*p < 0.01, \*\*\*p < 0.001; n.s., not significant. See Supplementary Table 3 for further details of the statistical analyses.

129 maintaining fixed proportions of each condition throughout sessions (Figure 2B). Mice were trained in  
130 a custom automated behavioral setup, supporting simultaneous individualized training of multiple mice  
131 in their home cage (Figure S3 and see Methods). Upon completion of the automated training protocol  
132 in their home cage, mice transitioned to a head-restrained setup for individual recordings, allowing for  
133 well-controlled photometry recordings over numerous trials (~100,000 trials from 30 mice in sum, see  
134 supplementary table T1). Mice reliably transferred their learning from the automated training to the  
135 head-fixed condition (Figure 2C). The ENGAGE task was designed to probe fluctuations of hyper- and  
136 hypo- engagement, supported by high proportions of both impulsive and omission errors (Figures 2D).  
137 On average, the performance of mice was impacted by all trial variables: improving psychometrically  
138 as a function of increased intensity of the auditory cue, while performance at low cue intensities  
139 benefitted from the addition of the visual aid. The tone cloud contributed to overall attentional load,  
140 resulting in reduced hit rates, primarily in trials with intermediate cue intensities, as well as directly  
141 increasing impulsive error rates (Figure 2E).

142 Within the ENGAGE task, both ACCp and OFCp claustrum populations were recruited by impulsive  
143 as well as correct licks (Figures 2F-G, S4A, B). In contrast, ‘miss’ trials provided a window into the  
144 claustral representation of the go-cue in the absence of confounding lick events (Figures 2H, S4C). In  
145 order to quantify the degree to which discrete temporal epochs contributed to the activity of claustral  
146 networks, we fit a linear encoding model to the data<sup>41</sup>, creating a time-varying event kernel to relate  
147 each event to its corresponding neural signal. We then compared the cross-validated explained variance  
148 (CvR<sup>2</sup>) for each event independently, as well as the unique contribution ( $\Delta R^2$ ) of that event to explaining  
149 the total calcium signal (Figure 2I, S5A, B; supplementary table T2 and Methods). This analysis served  
150 to quantify claustral activity with relation to particular behavioral events, revealing that, as reported in  
151 the cortex<sup>41,42</sup>, claustrum activity in both ACCp and OFCp networks was evoked by spontaneous  
152 locomotion (Figure S5C); task-related licking (Figure S5D); and, in some mice, by sensory stimuli  
153 (Figure S5E). Strikingly, trial onset was strongly represented in ACCp, but not in OFCp activity (Figure  
154 2J, K). Indeed, trial onset appears to have been a significant catalyst of impulsivity, as 82% of impulsive  
155 errors occurred within 1 second of the BBN signaling trial onset (Figure 2F). The unique coupling of  
156 the ACCp signal to this major determinant of impulse errors suggested that that the ACCp network may  
157 function to modulate response inhibition.

158 We therefore wished to determine whether ACCp activity leading up to trial onset may vary in  
159 preparation for this predictable, yet challenging aspect of trial structure. Plotting ACCp activity by trial  
160 outcome (Figure 2L), we observed that pre-trial ACCp activity was lower on average preceding trials  
161 terminated by impulsive errors, compared to hit trials (Figure 2M). In fact, pre-trial ACCp activity  
162 exhibited an inverse correlation with impulsive errors, such that lower pre-trial ACCp activity  
163 corresponded to a higher probability that the trial would result in a premature lick (Figure 2N).  
164 Intriguingly, the opposite relationship was observed between pre-trial ACCp activity and miss errors,  
165 such that trials with higher pre-trial ACCp activity were more likely to result in misses (Figure 2O).

166 OFCp pre-trial activity was not significantly lower before impulsive errors (Figure S6A, B), nor was it  
 167 correlated with impulse errors (Figure 2P) or misses (Figure 2Q). Importantly, we observed no  
 168 correlation between pre-trial ACCp activity and reaction time in hit trials, suggesting that ACCp activity  
 169 related specifically to the capacity of mice to engage with the trial, rather than correlating with  
 170 disruptions to perception or action (Figure S6C, D). In sum, while ACCp and OFCp claustral networks  
 171 are recruited during multiple stages of the task, ACCp activity was uniquely tied to trial onset and to  
 172 the propensity of mice to engage in impulsive licking following low activity levels, or misses following  
 173 high activity.

174

### 175 Elevating ACCp activity reduces impulsive action

176 In order to address the causal role ACCp activity plays in controlling impulsive behavior and  
 177 engagement, we co-expressed the excitatory DREADD hM3Dq together with GCaMP6s in ACCp  
 178 neurons (n=5, see supplementary table T1). This enabled a direct measurement of the effects of  
 179 chemogenetic manipulation on ACCp activity within the context of the task (Figures 3A, S7A). Mice  
 180 underwent behavioral training as described above, and were habituated to saline injections during head-  
 181 restrained behavioral sessions. CNO administration (10mg/kg, i.p.) reliably elevated spontaneous  
 182 claustrum activity (Figure 3B-C). Mice were then tested following administration of either saline or  
 183 CNO on interleaved days. Strikingly, CNO significantly and reversibly reduced impulsive error rates,  
 184 implicating the ACCp in control of impulsivity (Figure 3D). CNO administration did not change  
 185 impulsive error rates in GCaMP6s controls (Figure S7B). It lead to no changes in the representation of  
 186 task parameters in the ACCp signal in hM3Dq mice (Figure S7C), nor did CNO affect the response  
 187 times of mice in hit trials or their overall success rate (Figure S7D, E). Intriguingly, CNO administration  
 188 induced a shift in the distribution of trial outcomes over the course of a session, such that in the first  
 189 half of the session, impulsive errors were largely replaced by hits, while in the second half of the session,  
 190 miss trials were more common (Figure 3E). Consistent with interpreting an elevation of miss trials as a

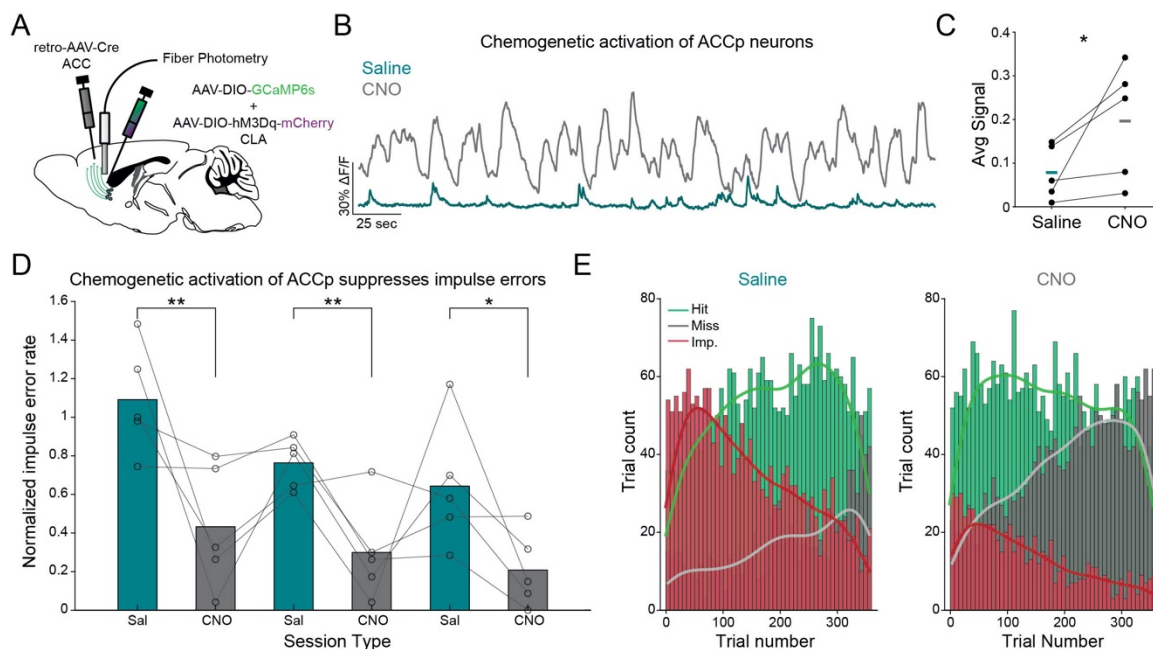

**Figure 3. Chemogenetic facilitation of ACCp activity diminishes impulsive behavior.** (A) Approach for simultaneous chemogenetic activation and recording of ACCp activity. (B) Example recordings of spontaneous activity from an ACCp mouse following saline (turquoise) or CNO (gray) administration. (C) Average spontaneous calcium signal following saline vs CNO (10mg/kg i.p.) administration (n=5 mice). (D) Comparison of impulsive errors in interleaved daily sessions of saline vs CNO, normalized to the average rate over 3 prior days of saline habituation (n=5 mice). (E) Binned histograms (vertical lines) and kernel fit (smooth horizontal lines) of the distribution of trial outcome within saline (left) vs CNO (right) sessions (n=3 sessions/each from 5 mice; 360 trials/session). Unless noted otherwise, data are mean  $\pm$  s.e.m. \*p < 0.05, \*\*p < 0.01, \*\*\*p < 0.001; n.s., not significant. See Supplementary Table 3 for further details of the statistical analyses.

191 decrease in engagement, streaks of consecutive miss trials were more common following CNO ([Figure](#)  
192 [S7F](#)). Thus, chemogenetic induction of ACCp activity reduced impulsivity at the cost of increased miss  
193 trials over prolonged sessions.

194

### 195 **ACCp activity reflects attentional strategy**

196 We next addressed the distribution of behavioral strategies taken by mice in dealing with the ENGAGE  
197 task. We divided mice into three behavioral categories based on the degree to which their behavior was  
198 affected by task parameters ([Figure 4A, B](#)). 5/25 mice exhibited a selective approach, primarily  
199 participating in easy trials with prominent cues or a visual aid (*selective*; cue modulation index >0.5).  
200 A second group of mice (6/25) exhibited behavior that was consistent across trial parameters  
201 (*consistent*; cue modulation index <0.5), and scaled with cue intensity. Both groups were minimally  
202 affected by the cloud distractor (cloud modulation index < 0.04). In contrast, the largest group of mice  
203 (14/25), was more susceptible to interference by the cloud (*erratic*; cloud modulation index >0.04). We  
204 next addressed whether these groups corresponded to other elements of behavior in the task. *Consistent*  
205 mice exhibited the highest overall success rate (mean rate 51%), distinguished from *erratic* mice, whose  
206 success rate was lowest (mean rate 38%) ([Figure S8A](#)). The groups also differed in their impulsive error  
207 rates, with *erratic* mice exhibiting a higher probability of performing impulsive licks, which further  
208 increased in the presence of the tone cloud ([Figure 4C](#)). As noted earlier, impulsive errors closely  
209 coupled to trial onset. This effect varied with the strategy of mice, and was most prominent in *erratic*  
210 mice, evident in faster response times in impulsive errors ([Figure 4D](#)). Importantly, response times in  
211 hit trials did not differ between groups, suggesting that potential confounds, relating to perception or  
212 motor deficiencies across behavioral categories, are unlikely ([Figure S8B](#)). Thus, *erratic* mice appeared  
213 to be hyper-engaged with the task, exposing them to impulsive erroneous responses to the trial-onset  
214 cue and the cloud.

215 Consistent with the coupling of impulsive errors and ACCp activity, we observed an inverse correlation  
216 between the response time in impulsive trials and the unique contribution of trial onset to the ACCp  
217 signal ([Figure S8C](#)). Furthermore, *erratic* mice, which were the most prone to impulsive errors, showed  
218 the strongest ACCp response to trial onset ([Figure 4E](#)). In light of this, we re-addressed ACCp pre-trial  
219 activity, specifically in *erratic* mice. The association between trial outcome to ACCp pre-trial activity  
220 was even more pronounced in this group in comparison to all mice ([Figure 4F, G](#)). Maintaining a strong  
221 negative correlation between pre-trial activity and impulsivity ([Figure 4H](#)), the positive correlation of  
222 ACCp pre-trial activity in *erratic* mice with misses was stronger compared to all mice ([Figure 4I](#)).  
223 *Erratic* mice also made more streaks of consecutive misses compared to the other groups ([Figure 4J](#)),  
224 consistent with the notion that these mice transition between states of extreme engagement,  
225 characterized by low ACCp activity, and periods of ‘zoning out’, characterized by high ACCp activity.  
226 In addition, these streaks (>5 consecutive misses) were preceded by an increased reaction time in hit  
227 trials ([Figure S8D](#)), as may be expected by a gradual decrease in engagement (‘zoning out’). Thus, by  
228 considering individual differences in strategy within the ENGAGE task, we highlight the bidirectional  
229 relationship between ACCp activity and hyper-engagement vs. disengagement.

230

### 231 **Clastrum activity fluctuates on ultra-slow scales, together with inputs from auditory cortex**

232 To understand whether ACCp activity is driven by cortical projections to the claustrum, we performed  
233 recordings of axon-targeted GCAMP6s, expressed in inputs to the claustrum from the ACC (ACCi) and  
234 auditory cortex (AUDi), together with jRGECO1a activity in ACCp neurons ([Figure S9A](#)). Spontaneous  
235 correlations of ACCi or AUDi with ACCp were low, suggesting that neither of these inputs is the main  
236 driver of spontaneous ACCp activity ([Figure S9B](#)). During the ENGAGE task, however, a strong  
237 correlation emerged between AUDi and ACCp ( $0.6 \pm 0.1$ , in comparison to spontaneous correlation of



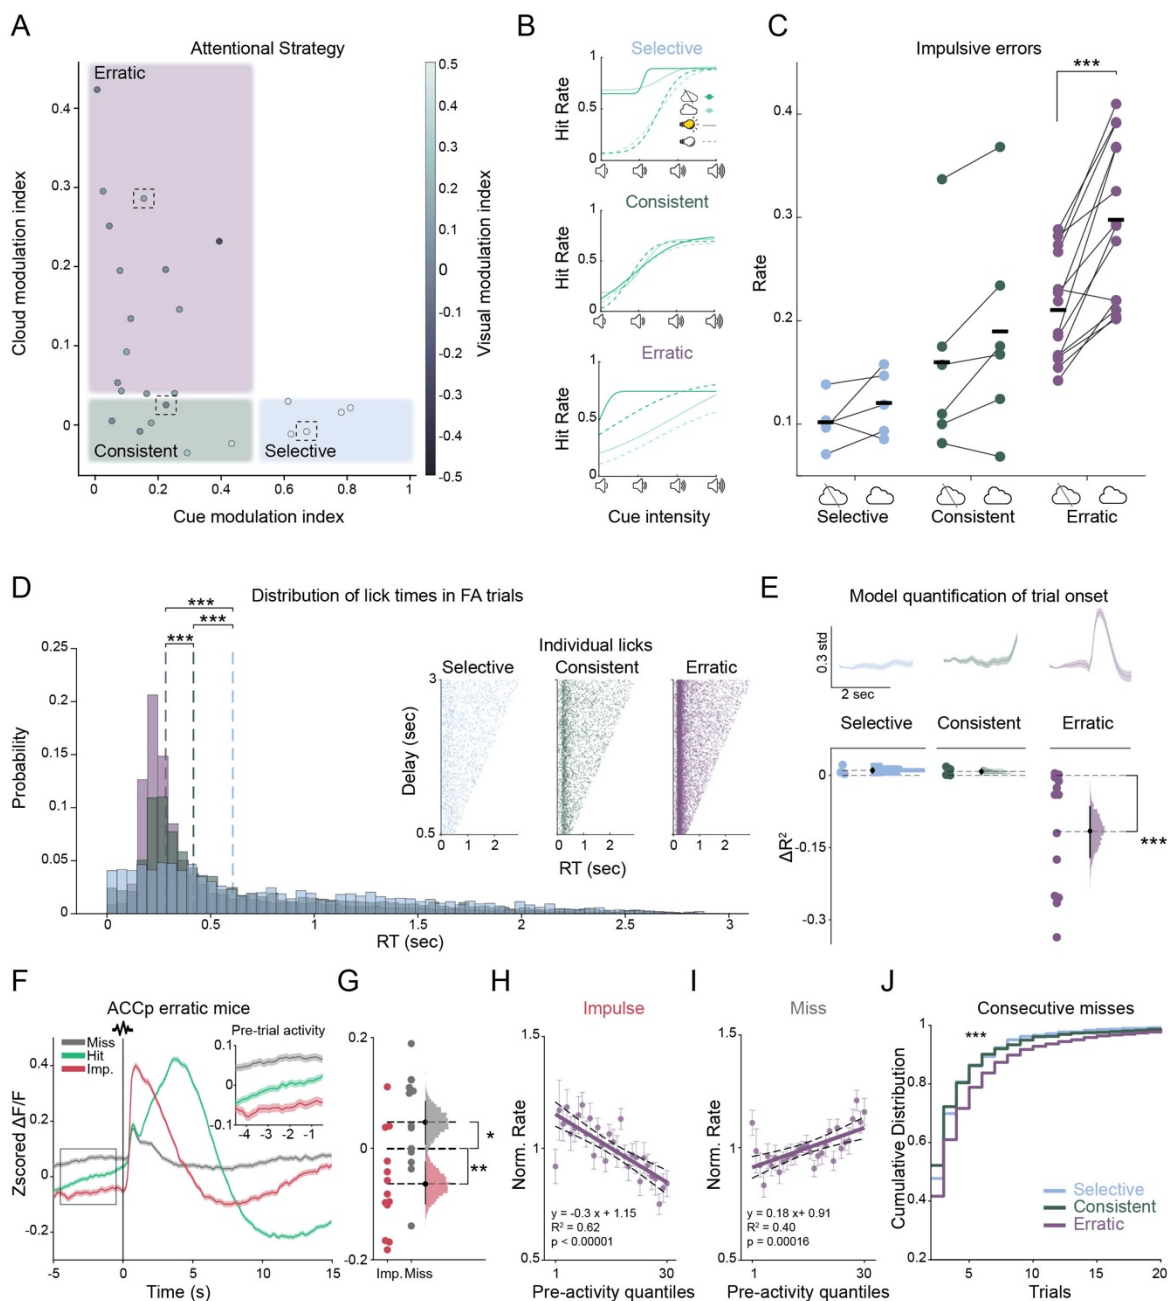

**Figure 4. ACCp activity corresponds to individual differences in behavioral strategies.** (A) Individual mice are plotted according to their modulation indices depicting the dependency of individual hit rates on cue intensity (cue modulation index), cloud (cloud modulation index), or visual aid (visual modulation index, represented by the shading of the dots). Mice ( $n=25$ ) were grouped into three groups, based on their strategy in the task ('selective'= cue modulation index $>0.5$ ; 'consistent'= cloud modulation index $<0.04$  & 'erratic';  $n=5, 6, 14$ , respectively). (B) Psychometric curves of representative mice from each group (dotted frames in A). (C) Impulse error rate in absence or presence of the tone-cloud, by behavioral group. (D) Distribution of impulsive lick response times. Dotted lines indicate distribution medians. Inset depicts all trials as a function of the random delay period. (E) Representation of trial onset in the ACCp signal. Top: Average responses in representative ACCp signals. Bottom: Model quantification of trial onset response. Individual mice ( $n=3, 4, 13$ ) and bootstrapped distribution of means with 95% confidence intervals. (F) Mean activity in ACCp recordings from erratic mice ( $n=13$ ) aligned to trial onset, separated by outcome. Inset depicts pre-trial activity. (G) In erratic mice the ACCp activity preceding impulsive errors is low, while ACCp activity preceding miss trials is high. Individual mice and bootstrapped distribution of means with 95% confidence intervals. (H-I) Normalized impulse (H) or miss (I) error rate, as a function of pre-trial activity of ACCp in erratic mice. Thick line represents linear fit, dotted lines represent 95% confidence intervals. (J) Cumulative distribution of consecutive miss trials for each behavioral group. Unless noted otherwise, data are mean  $\pm$  s.e.m. \* $p<0.05$ , \*\* $p<0.01$ , \*\*\* $p<0.001$ ; n.s., not significant. See Supplementary Table 3 for further details of the statistical analyses.

238 0.22 $\pm$ 0.1). This contrasted with the correlations between ACCp and both OFCp and ACCi, which were  
 239 maintained at a similar level in the task as during spontaneous recordings (Figure S9C-D). The AUDi  
 240 signal also represented task events similarly to the ACCp with respect to licking (Figure S9E), cue  
 241 responses (Figure S9F), and representation of trial onset (Figure S9G). However these transient events

242 are unlikely to account for the increase in correlation between ACCp and AUDi as the cross-correlation  
243 between the two signals was maintained over prolonged time (Figure S9C). In fact, pre-trial activity  
244 was correlated between the ACCp and AUDi, while no correlation of pre-trial activity was evident  
245 between the ACCp and either the OFCp or ACCi (Figure S9H, I). These results suggest that the ACCp  
246 and AUDi acquired a common source of slow modulation within the context of the ENGAGE task,  
247 from which OFCp and ACCi were exempt. Behavioral sessions lasted up to three hours, enabling  
248 analyses of slow periodicity of pre-trial activity during continuous task performance. Indeed, we  
249 observed that activity of all recorded channels tended to fluctuate at an ultra-slow time scale, on the  
250 order of tens of minutes (0.1-0.7 mHz; Figure S9J). However, not all signals from all mice exhibited  
251 these fluctuations, and interestingly, the mice whose ACCp activity lacked ultra-slow fluctuations were  
252 associated with the *erratic* group, which employed the least moderated behavioral strategy (Figure  
253 S9K). In sum, a strong correlation emerges between the ACCp and AUDi within the context of the  
254 ENGAGE task, maintained across ultra-slow time scales, potentially corresponding to a moderated  
255 approach to task performance.

256

### 257 **High ACCp activity corresponds to higher slow-wave activity and deeper, unresponsive sleep**

258 Sleep can be considered as the extreme end of the vigilance-disengagement spectrum. Claustror-  
259 forebrain activity has recently been associated with sleep, particularly with the occurrence of slow wave  
260 activity (SWA, EEG spectral power below 4Hz) in mice<sup>14</sup>. To further investigate how specific claustror-  
261 frontal subnetworks are recruited during extreme states of disengagement, we performed simultaneous  
262 polysomnography recordings (EEG, EMG, and video) together with fiber photometry from ACCp and  
263 OFCp networks (Figure 5A; ACCp n=6, OFCp n=6, Methods, and see supplementary table T1). During  
264 daytime 'lights on' periods, mice spent 34.4±5.8%, 54±7.1%, and 8.1±1% of their time in wakefulness,  
265 NREM sleep, and REM sleep, respectively (Figure 5B-D), in agreement with the literature<sup>43</sup>. We found  
266 that ACCp activity was lowest in REM sleep and highest during NREM sleep, while intermediate  
267 activity was observed in wakefulness (Figure 5E). OFCp similarly demonstrated low activity in REM  
268 and high activity in NREM. Yet unlike ACCp, activity in this network during wake trended towards  
269 even higher levels than those observed during NREM (Figure S10A). We proceeded to examine whether  
270 ACCp activity correlates with specific EEG patterns by dividing ACCp activation into quartiles within  
271 each state and examining the corresponding EEG power spectrum (Figure 5F; Methods). We observed  
272 that different levels of ACCp activity were associated with different profiles of SWA (< 4Hz) and theta  
273 frequencies (6 - 9Hz). SWA is an established marker of sleep depth<sup>44</sup>, and theta activity is maximal  
274 during active exploration<sup>45</sup>. Thus, we used the ratio between SWA and theta power as an EEG index  
275 for disengagement, and assessed its relation with ACCp activity. We found that ACCp activation  
276 exhibited a positive linear relationship with SWA-to-theta ratio in each behavioral state (Figure 5F, see  
277 also supplementary table T3 and Methods).

278 Given the association between ACCp activity and engagement in the ENGAGE task, together with the  
279 tight relation between ACCp activity and SWA (which is associated with the depth of natural sleep),  
280 we hypothesized that high ACCp activity levels would also be associated with a deeper disengagement  
281 from the sensory environment during sleep, leading to a lower probability of sensory-evoked  
282 awakenings. To examine this, we set up an auditory arousal threshold experiment<sup>7</sup>, where we delivered  
283 sounds approximately every minute and determined offline whether each trial resulted in sound-evoked  
284 awakening (Figure 5G; Methods). We found that in 9 of 11 recordings, ACCp pre-trial activity was  
285 higher before 'maintained sleep' trials than before trials resulting in awakening (Figure 5H). Again, this  
286 profile was specific for the ACCp network, as OFCp activity did not significantly differ between events  
287 leading to awakening vs maintained sleep (Figure S10B). Together, these data establish a specific  
288 association between ACCp activity and engagement, where activity in this claustror-cortical projection

289 network is maximal during NREM sleep and in deep sleep when sensory stimuli rarely wake up the  
 290 animals, and is further associated with higher EEG SWA-theta ratio across behavioral states.

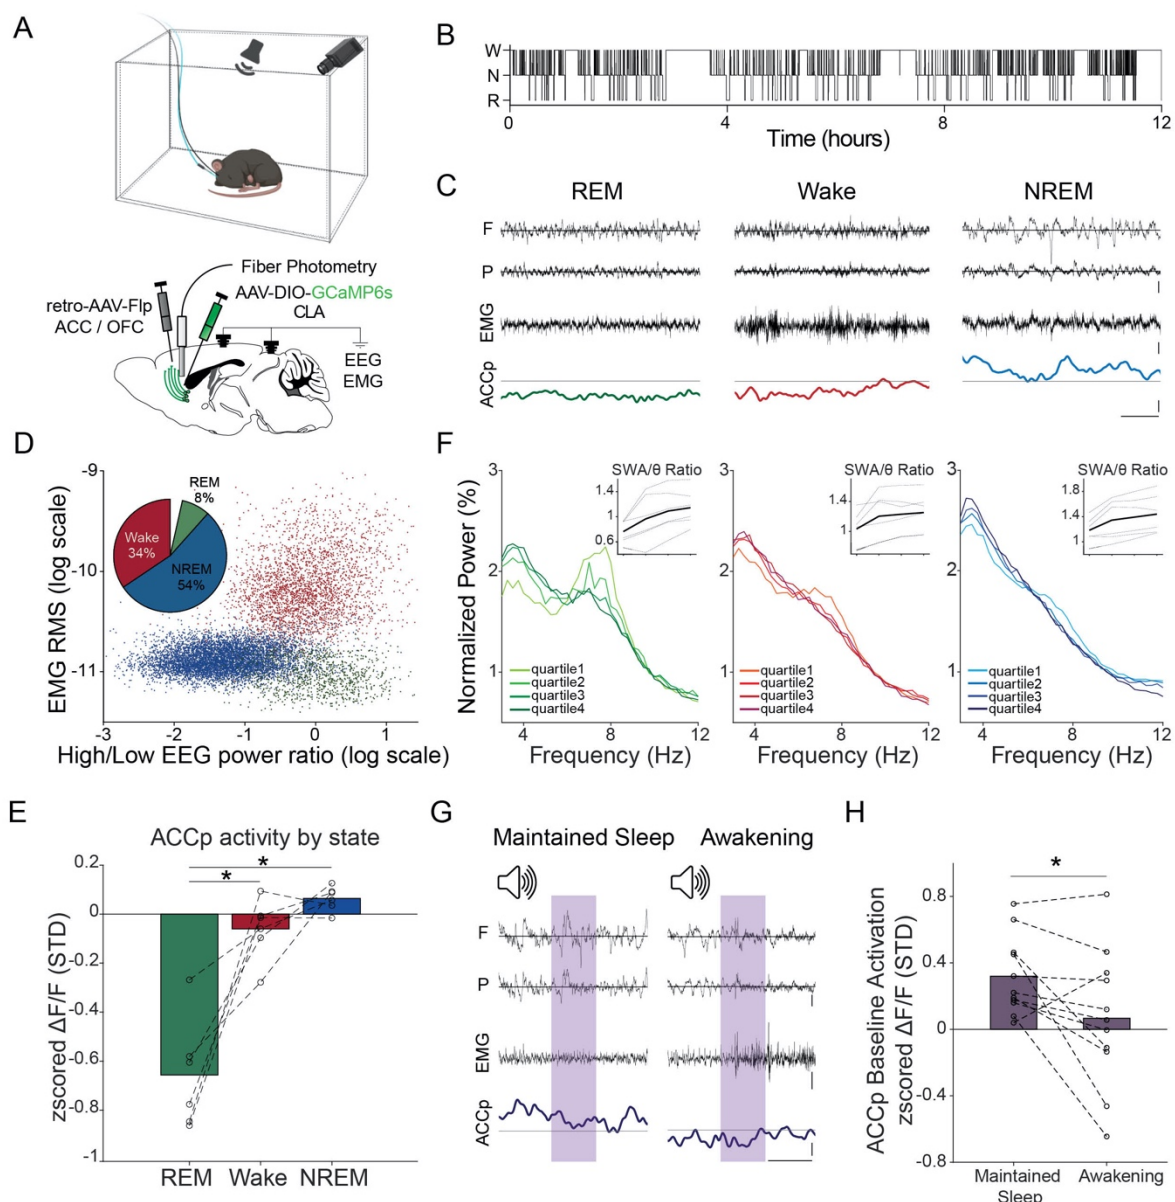

**Figure 5. Claustral ACCp activity is tied to deeper NREM sleep.** (A) Top: Diagram of experimental setup for recording from a freely behaving mouse in its home-cage under video surveillance, in the presence of a speaker for tone presentations. Bottom: Simultaneous monitoring of frontal and parietal EEG, neck EMG, and fiber photometry from ACCp or OFCp claustral neurons. (B) Representative hypnogram (time-course of sleep/wake states). Each black tick marks a single 4s data epoch. W – wake; N – NREM; R-REM. (C) Representative traces of frontal (F) and parietal (P) EEG (top), EMG (middle), and ACCp GCaMP6s (bottom) signals during REM (left), wake (middle), and NREM (right). For ACCp signal, horizontal gray line represents 0 of the zscored  $\Delta f/f$ . Black vertical calibration bars in the utmost right represent 1mV (EEG & EMG) and 1std (GCaMP). Black horizontal calibration bar in the bottom right corner represents 1s. (D) Representative scatter plot distribution of EMG root mean square (y-axis) versus frontal EEG power distribution (ratio between power in high [ $> 25\text{Hz}$ ] versus low [ $< 5\text{Hz}$ ] frequencies, x-axis). Each dot marks a single 4s data epoch. Red, wakefulness; Green, REM; Blue, NREM. Wake is associated with high-frequency EEG activity and high muscle tone, NREM is associated with low-frequency EEG activity and low muscle tone, and REM is associated with high-frequency activity and low muscle tone. Embedded pie chart (top left) shows average time spent in each state across the entire data (n=12 mice). (E) Average ACCp claustrum calcium activity in REM, wake, and NREM (n=6). (F) Normalized EEG power (% of total power, y-axis) as a function of frequency (Hz, x-axis) in each state as a function of ACCp claustrum activity (quartiles, n=6). Left, REM (green); Middle, wake (red); Right, NREM (blue). Insets (top right corner) show SWA-to-theta ratios (y-axis) for each ACCp activation quartile (x-axis; from minimal to maximal) in each animal separately (n=6). Mean ratios are depicted as a black line, and individual animals as dashed lines. (G) Representative traces of EEG (top - frontal and parietal), EMG (middle), and ACCp GCaMP6s (bottom) in auditory stimulation trials associated with maintained sleep (left) vs. awakening (right). Purple vertical bars mark intervals of 1s tone-pip presentation (Methods). Scale bars as in C. (H) ACCp baseline activity (y-axis) for trials associated with maintained sleep (left) vs. awakening (right). Each dot represents a separate ~10h experiment (11 experiments in n=6 mice). Unless noted otherwise, data are mean  $\pm$  s.e.m. \* $p < 0.05$ , \*\* $p < 0.01$ , \*\*\* $p < 0.001$ ; n.s., not significant. See Supplementary Table 3 for further details of the statistical analyses.

## 291 Discussion

### 292 A unifying perspective on the role of the claustrum

293 Proposals regarding the function of the claustrum have been framed within the context of two seemingly  
294 distinct timescales. On the one hand, the claustrum has been proposed to function in the processing of  
295 acute sensory events or distractors, in the context of salience and the gating of sensory perception<sup>18–</sup>  
296<sup>21,32,38,46</sup>. On the other hand, claustrum activity has been linked to slow, state-like transitions and  
297 oscillations, and even consciousness<sup>13,14,22,47</sup>. The detailed description provided in this work, of the  
298 activity of distinct claustrum populations during the ENGAGE task, as well as during natural sleep,  
299 bridges acute and prolonged timescales. Our observations are consistent with the majority of  
300 experimental observations and hypotheses published to date regarding the function of the claustrum,  
301 and identify a role for ACCp claustral neurons in controlling the full continuum of engagement,  
302 providing a holistic and consistent framework for unifying the different perspective on claustral  
303 function (Figure S1).

304 Our study supports the existence of parallel modules of claustrum function, by defining two  
305 anatomically, physiologically, and functionally distinct networks, identified by a projection bias to ACC  
306 or OFC. Task events and outcomes are broadcast to both OFC and ACC, while trial onset, the most  
307 predictable element of the task, was reported selectively by ACCp neurons. Recruitment patterns of  
308 projection-defined claustral neurons identified in our recordings may reflect differences in their passive  
309 properties<sup>32,48–50</sup> or genetic identity<sup>19,20,36,46,51</sup>, but may also define an orthogonal dimension of  
310 behaviorally-relevant ensembles of claustrum neurons-

311 Whereas OFCp pre-trial activity was uncorrelated with performance, high ACCp pre-trial activity  
312 correlated with misses, and low activity correlated with impulsive errors. The significance of these  
313 results is enhanced considering previous findings, in which silencing a genetically-defined  
314 subpopulation of claustrum projection neurons increased impulsive errors in the presence of sensory  
315 load<sup>19</sup>. It is likely that this effect is mediated primarily by ACCp neurons<sup>20</sup>. Modulation of the axis of  
316 engagement is of broad clinical significance, ranging from hyper-engagement associated with attention-  
317 deficit disorders<sup>52</sup>, and schizophrenia<sup>53,54</sup>, to hypo-engagement and apathy, commonly observed in  
318 neurodegenerative disorders<sup>55</sup>. The identification of a specific pathway bi-directionally controlling the  
319 full extent of the engagement axis is anticipated to serve as the basis for novel approaches for therapeutic  
320 intervention.

321 The capacity to explore a large number of trials across a rich parameter space within the context of the  
322 ENGAGE task, exposed individual differences in attentional strategies employed by mice. Some mice  
323 were discriminatory in their approach, such that *selective* mice exhibited a bias towards the visual cues  
324 and most prominent auditory cues, while *consistent* mice prioritized the auditory cue over the infrequent  
325 visual cue. However, most mice (*erratic*) exhibited behavior that was less moderated, attempting to  
326 respond to all the cues within the task (auditory cues of all attenuations, as well as visual cues). The  
327 hyper-vigilant approach of *erratic* mice exposed them to impulsive actions in response to the trial onset  
328 tone, as well as the tone cloud distractor. This approach also appeared to be exhausting, leading to  
329 erratic mice to streaks of missed trials. Intriguingly, the ACCp signal of mice within the *erratic* group  
330 exhibited the most prominent representation of the trial onset tone, as well as the strongest bidirectional  
331 correlations with impulsive actions and omissions. While it is likely that individual differences in  
332 behavioral strategies and corresponding neural signals relate to task engagement, few mechanistic  
333 studies have probed these relations<sup>56</sup>. Broader implementation of automated training, supporting the  
334 investigation of sophisticated behavioral paradigms in large cohorts of animals, will enable further  
335 exploration of individual differences.

336 Likewise, our results support and shed new light on recent work associating claustrum activity and  
337 sleep, by establishing that the high ACCp claustral activity is associated with decreased engagement

338 during NREM sleep, and a reduced probability to awaken in response to auditory stimuli. This is in line  
339 with the fact that ablation of the claustrum most prominently impacts SWA in the ACC<sup>14</sup>. In addition,  
340 our long recordings during undisturbed sleep provide the first characterization of claustrum activity  
341 during REM sleep, which constitutes less than 10% of the light period in mice<sup>43</sup>. We found that  
342 claustrum activity is predominantly silent during REM sleep, an intriguing observation that is outside  
343 the scope of this report, but is worthy of further study.

#### 344 **Outstanding questions**

345 Evidence so far suggests that widespread activation of claustral projections to ACC would provide a  
346 feed-forward inhibitory signal<sup>19,23</sup>. However the mechanism through which this would modulate  
347 engagement remain an open question. The role of the ACCp in gating engagement can be phrased as  
348 promoting either response inhibition or attentional inhibition<sup>57</sup>. On the one hand, the ACC has been  
349 implicated in conveying a corollary discharge of the motor plan to sensory areas<sup>58,59</sup>. Reduced activity  
350 of inhibitory signals that regulate this function could lead to premature execution of a motor plan in  
351 response to an irrelevant sensory distraction, i.e. the ACCp functions in response inhibition<sup>60</sup>. On the  
352 other hand, the activity of the ACCp network could regulate sensory perception through modulation of  
353 sensory cortex, either directly<sup>19</sup> or by amplifying cortico-cortical projections from the ACC to sensory  
354 cortical targets, i.e. the ACCp functions in attentional selectivity<sup>23,61</sup>. As perception in rodents is  
355 predominantly inferred indirectly via a motor action such as a lick, dissociating between response  
356 inhibition and attentional selectivity is challenging. Furthermore, predictive processing and perception  
357 may be intimately intertwined<sup>62</sup>. Resolving the specific mechanistic cognitive function implemented  
358 by ACCp neurons remains open for further investigation, likely requiring matched cortical and claustral  
359 recordings and manipulations.

360 Another mechanism through which the claustrum could modulate cortical activity is by impacting  
361 cortical synchronicity at different frequencies<sup>22</sup>. High frequency cortical oscillations have been closely  
362 linked to attentional processes and arousal<sup>45,63,64</sup>. In addition, the claustrum has been implicated in  
363 regulating slow waves during sleep, and generating sleep-like dynamics during wakefulness<sup>13,14,65</sup>. Our  
364 results demonstrate a causal role for pre-trial claustrum activity fluctuations in determining  
365 performance, as well as a correlation of ACCp activity and SWA-to-theta ratio of cortical EEG.  
366 Furthermore, we observe a reduction in ACCp activity during REM sleep, a behavioral state associated  
367 with desynchronized cortical activity. It is therefore possible that the mechanism through which the  
368 claustrum modulates engagement is by impacting regional cortical oscillations, which differ during  
369 vigilant behavior versus lapses<sup>66</sup>. The limited temporal dynamics of calcium signals do not lend  
370 themselves to answer questions relating to fast neural activity and oscillations, and future  
371 electrophysiological studies are likely to shed more light on the spectral properties of claustral-cortical  
372 activity during behavior.

373 In summary, ascribing a role for claustral neurons projecting to the anterior cingulate cortex in  
374 modulating the full axis of engagement, from hyper-vigilance and impulsivity through to ‘zoning out’  
375 and on to deep sleep, provides a holistic explanation of claustral function. Importantly, this framework  
376 implies that the breadth of circumstances during which the claustrum is recruited is wider than  
377 previously thought, likely spanning the entire range of events in which salient information is processed,  
378 such as learning, rewarding or stressful events, and social behavior.

379

## 380 **Methods**

381 **Animals:** All mice described in this study were male C57BL/6JOLAHSD obtained from Harlan  
 382 Laboratories, Jerusalem Israel. Mice were housed in groups of same-sex littermates and kept in a  
 383 specific pathogen-free (SPF) animal facility under standard environmental conditions- temperature (20–  
 384 22°C), humidity (55 ± 10 %), and 12-12 h light/dark cycle (7am on and 7pm off), with ad libitum access  
 385 to water and food. Mice were randomly assigned to experimental groups. All experimental procedures,  
 386 handling, surgeries and care of laboratory animals used in this study were approved by the Hebrew  
 387 University Institutional Animal Care and Use Committee (IACUC; NS-19-15584-3; NS-19-15788-3).  
 388 While all experiments were performed in male mice, we do not anticipate the results to differ drastically  
 389 between males and females.

390

### 391 **Surgery:**

392 **Stereotactic surgery and viral injections:** Induction and maintenance of anesthesia during surgery was  
 393 achieved using SomnoSuite Low-Flow Anesthesia System (Kent Scientific Corporation). Following  
 394 induction of anesthesia, animals were quickly secured to the stereotaxic apparatus (David KOPF  
 395 instruments). Anesthesia depth was validated by toe-pinching and isoflurane level were adjusted (1-  
 396 5%) to maintain a heart rate of ~60bpm. The skin was cleaned with Betadine (Dr. Fischer Medical),  
 397 Lidocaine (Rafa Laboratories) was applied to minimize pain, and Viscotear gel was applied to protect  
 398 the eyes. An incision was made to expose the skull, which was immediately cleaned with Hydrogen  
 399 peroxide (GADOT), and a small hole was drilled using a fine drill burr (model 78001RWD Life  
 400 Science). Using a microsyringe (33GA; Hamilton syringe, Reno, NV) connected to an UltraMicroPump  
 401 (World Precision Instruments, Sarasota, FL) virus was subsequently injected at a flow rate of 50-  
 402 100nl/min, following which the microsyringe was left in the tissue for 5-10 minutes after the termination  
 403 of the injection before being slowly retracted. For photometry experiments, an optic fiber ferrule  
 404 (400um, 0.37-0.48 NA, Doric Lenses) was slowly lowered into the brain. A custom-made metal head  
 405 bar was glued to the skull, the incision was closed using Vetbond bioadhesive (3M) and the skull was  
 406 covered in dental cement and let dry. An RFID chip (ID-20LA, ID Innovations) was implanted  
 407 subcutaneously. Mice were then disconnected from the anesthesia, and were administered with  
 408 subcutaneous saline injection for hydration and an IP injection of the analgesic Rimadyl (Norbrook) as  
 409 they recovered under gentle heating. Coordinates for the claustrum were based on the Paxinos and  
 410 Franklin mouse brain atlas<sup>67</sup>. Unless noted otherwise, viruses were prepared at the vector core facility  
 411 of the Edmond and Lily Safra Center for Brain Sciences, as described previously<sup>26</sup>.

| Experiment                                      | Constructs injected                         | Number of mice                            | Injection site                                                                    | Figure                    |
|-------------------------------------------------|---------------------------------------------|-------------------------------------------|-----------------------------------------------------------------------------------|---------------------------|
| Anatomical mapping of ACCp and OFCp populations | retroAAV-eGFP<br>retroAAV-tdTomato          | 6 mice (3 ACC/OFC; 2 ACC/ACC; 1 OFC/OFC)  | <b>OFC:</b> LM ±1; RC: +2.55; DV: -2.3;<br><b>ACC:</b> LM ±0.4; RC: 1.1; DV -1.75 | Fig. 1 & S2               |
| Anatomical mapping of ACCp and OFCp populations | retroAAV-H2B-GFP<br>retroAAV-H2B-tdTomato   | 10 mice (6 ACC/OFC; 2 ACC/ACC; 2 OFC/OFC) | <b>OFC:</b> LM ±1; RC: +2.55; DV: -2.3;<br><b>ACC:</b> LM ±0.4; RC: 1.1; DV -1.75 | Fig. 1 & S2               |
| Core-shell expression                           | retroAAV-H2B-GFP<br>retroAAV-H2B-tdTomato   | 1 PV-cre mouse (ACC/OFC)                  | <b>OFC:</b> LM ±1; RC: +2.55; DV: -2.3;<br><b>ACC:</b> LM ±0.4; RC: 1.1; DV -1.75 | Fig. S2                   |
| ACCp single channel claustrum                   | retroAAV-Cre (ACC)<br>AAV-DIO-GCaMP6s (CLA) | 5 mice                                    | <b>ACC:</b> LM ±0.4; RC: 1.1; DV -1.75<br><b>CLA:</b> LM ±3.3; RC: 0; DV: -4.15   | Figs. 1 & 2,4 S6, S9, S10 |

|                                                     |                                                                                                                            |                                                                                                      |                                                                                                                                            |                          |
|-----------------------------------------------------|----------------------------------------------------------------------------------------------------------------------------|------------------------------------------------------------------------------------------------------|--------------------------------------------------------------------------------------------------------------------------------------------|--------------------------|
| photometry recordings                               |                                                                                                                            |                                                                                                      |                                                                                                                                            |                          |
| OFCp single channel claustrum photometry recordings | retroAAV-Cre (OFC)<br>AAV-DIO-GCaMP6s (CLA)                                                                                | 5 mice                                                                                               | <b>OFC:</b> LM $\pm$ 1; RC: +2.55; DV: -2.3;<br><b>CLA:</b> LM $\pm$ 3.3; RC: 0; DV: -4.15                                                 | Figs. 1 & 2 S5-S7, S10   |
| Dual channel claustrum recordings                   | retroAAV-Cre (ACC)<br>retroAAV-flp (OFC)<br>AAV-DIO-jRGECO1a (CLA)<br>AAV-fDIO-GCaMP6s (CLA)                               | 4 mice                                                                                               | <b>OFC:</b> LM $\pm$ 1; RC: +2.55; DV: -2.3;<br><b>ACC:</b> LM $\pm$ 0.4; RC: 1.1; DV -1.75<br><b>CLA:</b> LM $\pm$ 3.3; RC: 0; DV: -4.15  | Figs. 1 & 2,4 S6-S10     |
| Dual channel claustrum recordings                   | retroAAV-Cre (OFC)<br>retroAAV-flp (ACC)<br>AAV-DIO-jRGECO1a (CLA)<br>AAV-fDIO-GCaMP6s (CLA)                               | 1 mouse                                                                                              | <b>OFC:</b> LM $\pm$ 1; RC: +2.55; DV: -2.3;<br><b>ACC:</b> LM $\pm$ 0.4; RC: 1.1; DV -1.75<br><b>CLA:</b> LM $\pm$ 3.3; RC: 0; DV: -4.15; |                          |
| Dual channel claustrum recordings                   | retroAAV-Cre (ACC)<br>retroAAV-flp (AUD)<br>AAV-DIO-jRGECO1a (CLA)<br>AAV-fDIO-GCaMP6s (CLA)<br>(not included in analysis) | 1 mouse                                                                                              | <b>AUD:</b> LM $\pm$ 4.1; RC: -2.8; DV: -2.4;<br><b>ACC:</b> LM $\pm$ 0.4; RC: 1.1; DV -1.75<br><b>CLA:</b> LM $\pm$ 3.3; RC: 0; DV: -4.15 | Figs. 1 & 2,4 S6-S10     |
| Dual channel claustrum recordings                   | retroAAV-Cre (AUD)<br>retroAAV-flp (ACC)<br>AAV-DIO-jRGECO1a (CLA)<br>AAV-fDIO-GCaMP6s (CLA)<br>(not included in analysis) | 2 mice – In one mouse two hemispheres were recorded in separate experiments for 3 data sets in total | <b>AUD:</b> LM $\pm$ 4.1; RC: -2.8; DV: -2.4;<br><b>ACC:</b> LM $\pm$ 0.4; RC: 1.1; DV -1.75<br><b>CLA:</b> LM $\pm$ 3.3; RC: 0; DV: -4.15 | Figs. 1 & 2,4 S6-S10     |
| Input (axonal) / output claustrum recordings        | retroAAV-Cre (ACC)<br>AAV-axon-GCaMP6s (Addgene 112005) (ACC)<br>AVV-DIO-jRGECO1a (CLA)                                    | 3 mice                                                                                               | <b>ACC:</b> LM $\pm$ 0.4; RC: 1.1; DV -1.75<br><b>CLA:</b> LM $\pm$ 3.3; RC: 0; DV: -4.15                                                  | Figs. 1 & 2,4 S3, S6-S10 |
| Input (axonal) / output claustrum recordings        | retroAAV-Cre (ACC)<br>AAV-axon-GCaMP6s (AUD)<br>AVV-DIO-jRGECO1a (CLA)                                                     | 3 mice                                                                                               | <b>AUD:</b> LM $\pm$ 4.1; RC: -2.8; DV: -2.4;<br><b>CLA:</b> LM $\pm$ 3.3; RC: 0; DV: -4.15                                                | Figs. 1 & 2,4 S3, S6-S10 |

|                                                           |                                                                      |                                                       |                                                                                                             |              |
|-----------------------------------------------------------|----------------------------------------------------------------------|-------------------------------------------------------|-------------------------------------------------------------------------------------------------------------|--------------|
| Chemogenetic activation of ACCp neurons                   | retroAAV-Cre (ACC)<br>AVV-DIO-GCaMP6s (CLA)<br>AAV-DIO-hM3Dq-mCherry | 5 mice, 2 ACC and 2 CLA injections in each hemisphere | ACC: LM $\pm$ 0.4; RC: 1.1 & 0.5; DV -1.75<br>CLA: LM $\pm$ 3.3 & $\pm$ 2.85; RC: 0 & +1; DV: -4.15 & -3.75 | Figs. 3 & S8 |
| ACCp single channel claustrum + EEG photometry recordings | retroAAV-Cre (ACC)<br>AAV-DIO-GCaMP6s (CLA)                          | 6 mice                                                | ACC: LM $\pm$ 0.4; RC: 1.1; DV -1.75<br>CLA: LM $\pm$ 3.3; RC: 0; DV: -4.15                                 | Fig. 5       |
| OFCp single channel claustrum + EEG photometry recordings | retroAAV-Cre (OFC)<br>AAV-DIO-GCaMP6s (CLA)                          | 6 mice                                                | OFC: LM $\pm$ 1; RC: +2.55; DV: -2.3;<br>CLA: LM $\pm$ 3.3; RC: 0; DV: -4.15                                | Figure S11   |

412

413 **EEG and EMG:** 12 mice underwent stereotactic surgery for viral expression of GCaMP in claustral  
414 projection neurons [retro-AAV-CRE from ACC and DIO-GCaMP6s in the claustrum (n=6); retro-  
415 AAV-CRE from OFC and DIO-GCaMP6s in the claustrum (n=6)], implanted with a fiber over the left  
416 claustrum and prepared for EEG and EMG recordings. Two screws, frontal and parietal (1 mm in  
417 diameter) were placed over the right hemisphere for EEG recording. Two additional screws were placed  
418 above the cerebellum as reference and ground. Two single-stranded stainless-steel wires were inserted  
419 to either side of the neck muscles to measure EMG. EEG and EMG wires were soldered onto a custom-  
420 made headstage connector. Dental cement was used to cover all screws and EEG/EMG wires. Following  
421 validation of photometry signal, mice were transported to Tel Aviv University for further recordings.

422 **Histology:** Mice were anesthetized for terminal perfusion by a mix of Ketamine/Xylazine and perfused  
423 with cold PBS, followed by 4% PFA. Following decapitation, heads were placed in 4% PFA overnight  
424 to preserve the location of the optic ferrule. Brains were then carefully extracted, and placed in 4% PFA  
425 for another night prior to transiting to PBS in preparation for sectioning and histology. The fixed tissue  
426 was sectioned using a Vibratome (7000 smz-2) at 60 $\mu$ m thickness.

427 In order to enhance GCaMP6s signals for analysis of axonal projections, floating section  
428 immunohistochemistry was performed (rabbit anti-GFP, Life Technologies, Bethesda, MD; catalog No.  
429 A-6455; final dilution to 1:500 in 3% normal horse serum), following previously described protocols  
430 <sup>26</sup>. mCherry (jRGECO) signal was likewise amplified for the visualization of DREADD expression  
431 (rabbit anti-RFP; Rockland, Limerick, PA; catalog No. 600-401-379; final dilution 1:1000 in 3% normal  
432 horse serum).

433 **Image acquisition:** Slides were scanned on a high-speed fully-motorized multi-channel light microscope  
434 (Olympus IX-81) in the microscopy unit of the Alexander Silberman Institute of Life Sciences. Slices  
435 were imaged at 10X magnification (NA=0.3), green and red channels exposure times were selected for  
436 optimal clarity and were kept constant within each brain series. DAPI was acquired using excitation  
437 filters of 350 $\pm$ 50 nm, emission 455 $\pm$ 50 nm; eGFP excitation 490 $\pm$ 20 nm, emission 525 $\pm$ 36 nm;  
438 tdTomato and Ruby excitation 555 $\pm$ 25 nm, emission 605 $\pm$ 52 nm and for Alexa 647 excitation 625 nm,  
439 emission 670 nm.

440 **Quantification and statistical analysis:** Cell counting and co-localization analysis: In order to quantify  
441 labelled cells (number and overlap), automated image analysis was used. For each claustrum seven  
442 images were captured from Bregma 1.1 mm to Bregma -1.06 mm, from 60  $\mu$ m thick slices separated  
443 by 360  $\mu$ m. The claustrum was manually cropped according to the outline depicted in the appropriate  
444 section from the Paxinos and Franklin mouse brain atlas <sup>67</sup>. The image files of the cropped claustrum



445 were used in the analysis pipeline, three channels for each image: DAPI, eGFP and tdTomato or Ruby.  
446 The data was analyzed using the CellProfiler v.3.0.0 co-localization pipeline ([www.cellprofiler.org](http://www.cellprofiler.org)),  
447 with minor modifications, including feature enhancement and shrink/expand objects<sup>68,69</sup>. For  
448 fluorescently labelled retroAAV analysis (n = 3 ACC/OFC; 2 ACC/ACC OFC/OFC mice), a DAPI  
449 object mask was generated and objects from eGFP and tdTomato channels that overlap with the mask  
450 were considered labelled cell bodies. Overlap was defined as the overlay of a detected cell body from  
451 the GFP channel coinciding with a cell body in the tdTomato channel, both coinciding with the DAPI  
452 mask. RetroAAV-H2B (6 ACC/OFC; 2 ACC/ACC; 2 OFC/OFC mice) expressed in the nuclei,  
453 providing lower background and allowing detection of labelled nuclei directly from eGFP and Ruby  
454 channels without a DAPI object mask. In addition, the analysis was modified such that object centroid  
455 distances were measured and calibrated such that only objects with a maximal 6 pixel centroid distance  
456 between them were considered to be double-labelled cells. Histograms corresponding to the spatial  
457 localization of the labelled cells were built in RStudio (Ver. 1.0.153).

458  
459 [Quantification of projections](#): Axonal projections of ACCp and OFCp populations were quantified from  
460 sections obtained from brains of mice which participated in the task (ACCp – 4 mice; OFCp – 3 mice),  
461 immuno-stained to enhance indicator (GCaMP6s or jRGECO1a, see above) fluorescence in projections.  
462 After alignment of section images to the Paxinos and Franklin mouse brain atlas<sup>67</sup> a manual threshold  
463 was set for every brain such that the claustrum area would be saturated, and background minimal,  
464 enabling a clear contrast for fluorescent processes. Structures of interest were selected based on previous  
465 anterograde tracing studies in the claustrum<sup>27</sup>. Analysis was conducted in Fiji (ImageJ) and quantified  
466 as the mean pixel intensity in a rectangle sampled within different brain divisions. Measurements were  
467 obtained from qualitatively similar positions in each section across mice.

468  
469 [Automated behavioral training](#): Training cages comprised of a 4cm diameter tube corridor connected  
470 to the home cage of the mice. At the end of the corridor a behavioral lick port (Sanworks) was  
471 positioned. Within the training cage mice had ad libitum access to food, while access to water was  
472 restricted to the output of the behavioral system. A radio-frequency identification (RFID) reader (ID-  
473 20LA, ID Innovations) was positioned above the corridor for individualized identification of mice.  
474 Auditory cues were delivered by a Bpod wave player (Sanworks) connected to earphones positioned on  
475 the corridor adjacent to the port. Experiments were controlled via an open source code MATLAB-based  
476 state machine (Bpod, Sanworks). A custom protocol was written in MATLAB in order to support  
477 individualized training by gating the Bpod state machine as a function of the output of the RFID reader.  
478 This enabled activation of different task parameters for individual mice based on their performance.  
479 Training comprised several stages, and each mouse progressed individually, according to its learning.  
480 Mice were then taught to associate the auditory-visual cue with water availability during a lick  
481 adaptation period. Entry of a mouse into the port (an RFID reading) initiated a trial, reported to the  
482 mouse by a 0.1 sec broadband noise (BBN, intensity = 70.5db SPL) marking trial onset. Trial initiation  
483 was followed by a varying delay period in which mice had to withhold lick responses. This delay period  
484 lasted 0.1 sec in the adaptation phase and was prolonged in the following training steps. If the mouse  
485 successfully withheld licking, a cue was presented at the end of the delay period, consisting of 5 pure  
486 tone pips of 6 kHz, 0.1 sec long (spaced 0.1 sec, intensity = 86.1db), a white LED light (these  
487 auditory/visual cues were referred to as AudVis). The first lick within a 1.5s window following cue  
488 onset was rewarded (10ul of drinking water). Impulsive or late licks were not rewarded, and mice had  
489 to exit the port (terminate and reinitiate RFID reading) before a new trial could be initiated. After mice  
490 reached satisfactory success rates (50-70% correct, 2.6 days on average) they proceeded to stage 2  
491 where the delay was prolonged to between 0.5-2s (2.5 days on average). Mice proceeded to stage 3,  
492 which included the full range of possible delays (0.5-3s) and a gradual transition to auditory trials with  
493 no visual aid (Aud) in three steps: 30% Aud (Stage 3a), 50% Aud (Stage 3b), and 70% Aud (Stage 3c).  
494 Following stage 3 (4.4 days on average) a pure tone-cloud masking stimulus was introduced (4s of

495 continuous chords assembled from logarithmically spaced pure tones in the frequency range of 1-  
496 10kHz, excluding the target cue frequency, intensity = 67.5db SPL), lasting from trial onset throughout  
497 the delay and cue. The tone-cloud was also introduced gradually. Stage 4a comprised of 70% auditory-  
498 visual trials with tone cloud (AudVisCloud) and 30% Aud (2.7 days in average). Stage 4b included 50%  
499 AudVisCloud trials, 20% auditory cloud trials (AudCloud), 15% Aud trials and 15% AudVis trials.  
500 After mice were familiar with the cloud in both visual and non-visual trials, we proceeded to stage 4c,  
501 and increased the rate of cloud trials to 65% AudCloud, while the rest of the trials comprised 15%  
502 AudVisCloud, 15% Aud, and 5% AudVis (mice spent on average 4.5 days in stages 4b + 4c). Finally,  
503 we gradually added 3 attenuations of the target cue. First, in stage 5a, 30% of the trials included the full  
504 range of attenuations (Go-Cue trial intensities were (db SPL): #1: 68.75db; #2: 81.2db; #3: 86.1db; #4:  
505 91.6db), which increased in stage 5b to 50% of the trials and then in stage 5c to 100% percent of the  
506 trials (13 days on average, depending on the availability of the recording system, adding up to a mean  
507 total of 29.6 days of training). Response duration and reward size were kept constant throughout  
508 training. Due to the COVID-19 pandemic, the training schedule of two mice was altered, and they were  
509 thus excluded from panels illustrating training data.

510 Task structure during head-restrained recordings was identical to the automated training, except that  
511 trials were initiated automatically every 20 seconds. Behavioral sessions contained blocks of trials  
512 containing 15 (in some cases shortened to 8 or 10) occurrences of each possible combination of  
513 parameters, in random order. These blocks were repeated 2-4 times as long as mice maintained  
514 participation, for a total of up to 1000 trials / mouse / day (sessions typically extended over 240-480  
515 trials). Trials in which the mouse licked late (>1.5s) were rare (~2% of all trials) and were thus also  
516 labelled as misses. The degree to which different trial parameters (cue intensity, cloud, visual aid)  
517 affected behavior was quantified by calculating a modulation index for the effect of each parameter on  
518 hit rates in the task (i.e. difference normalized by sum:  $Idx(A, B) = \frac{hit\_rateA - hit\_rateB}{hit\_rateA + hit\_rateB}$ ). For cue  
519 modulation, we compared hit rates in the second lowest intensity, which was the most variable, to the  
520 strongest intensity.

521 *In Vivo* fiber photometry recordings: Fiber photometry data was collected using a 1-site Fiber  
522 Photometry system (Doric Lenses, Canada) adapted to two excitation LEDs at 465nm (calcium-  
523 dependent GCaMP fluorescence) and either 405nm (isosbestic control channel) or 560nm (for two-  
524 color recording using jRGECO). Simultaneous monitoring of the two channels was made possible by  
525 connecting the LEDs to a minicube (with dichroic mirrors and cleanup filters to match the excitation  
526 and emission spectra; FMC4 or FMC5, Doric) via an attenuating patch cord (400  $\mu$ m core, NA=0.37-  
527 0.48). LEDs were controlled by drivers that sinusoidally modulated 560nm/465nm/405nm excitation at  
528 210/210/330Hz, respectively enabling lock-in demodulation of the signal (Doric Lenses, Canada).  
529 Zirconia sleeves were used to attach the fiber-optic patch cord to the fiber implant on the animal. Data  
530 were collected using Femtowatt photoreceiver 2151 (Newport) and demodulated and processed using  
531 an RZ2 (at TAU) or RZ5P (at HUJI) BioAmp Processor unit and Synapse software (TDT). LED  
532 intensities were individually modulated in each mouse to allow the recording of viable signals with the  
533 minimal intensity possible. To this end, 465nm LED intensity was gradually increased until robust  
534 GCaMP/jRGECO fluctuations were observed above noise. Next, the 405nm (isosbestic control channel)  
535 LED intensity was set to allow detection of motion artifacts. The total power at the tip of the patch cable  
536 was most often 0.05-0.1mW. The signal, originally sampled at 24414Hz, was demodulated online by  
537 the lock-in amplifier implemented in the processor, sampled at 1017.25Hz and low-pass filtered with a  
538 corner frequency at 4Hz. All signals were collected using Synapse software (TDT). EEG and EMG  
539 were digitally sampled at 1017 Hz (PZ2 amplifier, Tucker-Davis Technologies), and filtered online:  
540 both signals were notch filtered at 50/100 Hz to remove line noise and harmonics; then, EEG and EMG  
541 were band-pass filtered at 0.5-200Hz, and 10-100Hz, respectively. Due to a technical issue, EEG were  
542 also high-pass filtered in hardware > 2Hz but a comparison with full broadband (>0.5Hz) EEG in  
543 several animals verified signal differences were minor and did not affect the ability to analyze sleep

544 stages or SWA. Simultaneous video data (used for sleep scoring and for behavioral assessments) were  
 545 captured by a USB webcam (at TAU) or an IR camera (at HUJI, Basler) synchronized with  
 546 electrophysiology/photometry data. Offline, EEG and EMG were resampled to 1000 Hz (MATLAB,  
 547 The MathWorks) for sleep scoring and power spectrum analysis.

548 Behavioral fiber photometry recordings were made in one of three head-restrained conditions: 1)  
 549 Spontaneous recordings, in which no stimuli were presented, and the mouse was free to run on a  
 550 treadmill (Janelia 2017-049 Low-Friction Rodent-Driven Belt Treadmill) for 10min (for validation of  
 551 chemogenetic effects) or 40min (for correlation analyses). 2) Passive auditory sessions, in which  
 552 broadband noise or frequency sweeps (1-40Khz played at a 100kHz sample rate, through an RP2.1  
 553 processor, TDT), attenuated between 0-20db (SA1 amplifier, PA5 attenuator, TDT) were played while  
 554 the mouse was free to run on a treadmill. 3) Task sessions, which consisted of several blocks (1-4), each  
 555 consisting of 120-180 trials, as described above.

556 [Fiber photometry analysis](#): Unless otherwise noted, all analysis was performed using custom MATLAB  
 557 scripts. First, to correct for baseline drift due to slow photobleaching artifacts, particularly during the  
 558 first several minutes of each session, a 5<sup>th</sup> order polynomial was fit to the raw data and then subtracted  
 559 from it. After baseline correction,  $\Delta F/F$  was computed using the 99<sup>th</sup> lowest percentile value as  $F_0$  ( $\frac{\Delta F}{F} =$   
 560  $\frac{F - F_0}{F_0}$ ), and the resulting trace was z-scored relative to the mean and standard deviation of the entire  
 561 recording session to normalize between channels and across mice. For 2/30 mice, motion artifacts were  
 562 corrected by using the z-scored isosbestic control channel as a sample-by-sample  $F_0$  for computing  $\Delta F$ .

563 To correct for small session-to-session fluctuations in the signal, while maintaining quantitation of pre-  
 564 trial activity, we calculated pre-trial activity for every individual trial (four seconds before trial onset),  
 565 and used the pre-trial signal as a dependent variable in a linear model with recording session and trial  
 566 outcome as independent variables (baseline ~ outcome + session). A scalar value of the intercept and  
 567 estimate for each session was then subtracted from the corresponding data set, setting the mean baseline  
 568 for correct trials for each session at approximately zero. Pre-processed data was then cut into 20 second  
 569 windows (-5:15 seconds) around each behavioral epoch: trial onset, cue onset, lick onset and run onset,  
 570 and concatenated for each mouse to form an event-aligned activity matrix together with an information  
 571 table detailing the parameters and outcome of each trial.

572 [Analysis of spontaneous claustrum activity](#): Spontaneous calcium events were identified with the  
 573 MATLAB function *findpeaks*. To avoid multiple identification of single events or defining noise as  
 574 activity, we employed a threshold of a minimum prominence of 1 standard deviation and a minimum  
 575 of 2 seconds event width, measured at half prominence. Changing these parameters did not drastically  
 576 alter results.

577 [Linear encoding model](#): A linear encoding model was constructed, using ridge-regression to create time-  
 578 averaged kernels for each behavioral epoch in the task, following code from Musall et al., 2019<sup>41</sup>. For  
 579 each mouse, all trials from all sessions were used to create the full model. Ten-fold cross validated  
 580 estimation of the explained variance by the full model (CVR<sup>2</sup>) was then compared to that explained by  
 581 each individual label on its own (*single variable model*). The *unique contribution* of each variable was  
 582 estimated by the loss in explained variance ( $\Delta R^2$ ) by omitting each variable from the full model. Both  
 583 measures were normalized to the size of the window (Supplemental Table T2) and the CVR<sup>2</sup> of the full  
 584 model. Estimation statistics ([www.estimationstats.com](http://www.estimationstats.com)) were performed based on the work described  
 585 in<sup>70</sup>.

| Supplemental Table T2: Epochs for time-event kernels in the linear encoding model |              |             |             |                       |
|-----------------------------------------------------------------------------------|--------------|-------------|-------------|-----------------------|
| Variable name                                                                     | Abbreviation | Description | Time window | Selected from events: |
|                                                                                   |              |             |             |                       |

|                                      |         |                                               |          |                                                                     |
|--------------------------------------|---------|-----------------------------------------------|----------|---------------------------------------------------------------------|
| Rewarded licks                       | L1      | Lick events from hit trials                   | (-0.5,5) | First lick in hit trials                                            |
| Unrewarded licks                     | L2      | Lick events from impulsive error trials       | (-0.5,5) | First lick in impulsive error trials                                |
| Spontaneous licks                    | L3      | Lick events not associated with the task      | (-0.5,5) | Licks at times (-5,0) or (5,15) relative to trial onset             |
| Spontaneous runs                     | R       | Locomotion events outside the task            | (-0.5,5) | Runs at times (-5,0) or (5,15) relative to trial onset              |
| Auditory cue (4 attenuations)        | C1 - C4 | Auditory Go-cue                               | (0,3)    | Only from miss trials w/o visual aid                                |
| Visual stimulation                   | V       | Visual aid LED stimulus                       | (0,3)    | Only from miss trials with visual aid (compounded on auditory cues) |
| BBN                                  | B       | Trial onset                                   | (0,1)    | Miss trials and trials w/ first lick at >1 sec from trial onset     |
| Decay after correct trial            | O1      | Activity following hit                        | (-10,0)  | last 10 sec of trial                                                |
| Decay after incorrect trial          | O2      | Activity following impulsive/miss trials      | (-10,0)  | last 10 sec of trial                                                |
| pre-trial following correct trials   | B1      | Pre-trial activity following hit              | (0,5)    | Based on previous trial outcome                                     |
| pre-trial following miss trials      | B2      | Pre-trial activity following miss             | (0,5)    | Based on previous trial outcome                                     |
| pre-trial following impulsive trials | B3      | Pre-trial activity following impulsive errors | (0,5)    | Based on previous trial outcome                                     |

586

587 **Chemogenetic activation:** 30 minutes prior to each recording session, mice received an IP injection of  
 588 either saline as a control or clozapine-n-oxide (CNO), diluted to a final dilution of 1mg/ml (10 mg CNO  
 589 in 500ul DMSO and 9.5 ml saline) and administered at a dose of 10 mg/kg.

590 **Spectral analysis of pre-trial dynamics:** Pre-trial activity was analyzed over individual sessions of 300  
 591 trials each (shorter sessions were excluded from the analysis, and longer sessions were analyzed only  
 592 up to trial 300). A fast Fourier Transform (using the *fft* function in MATLAB) was applied to each  
 593 session, and the average power spectrum over sessions was compared to a threshold defined by the  
 594 maximal power obtained in each frequency over 1000 shuffling iterations of the data. The reported  
 595 fluctuation frequency is the peak of the power spectrum that crosses this threshold.

596 **EEG recordings during natural sleep: Undisturbed sleep.** Several weeks after surgery (due to transport  
 597 to TAU), mice (n=12) were placed in a new home cage within an acoustic chamber (40dB attenuation,  
 598 H.N.A, Israel) and connected to the EEG/EMG headstage and to the optic fiber patch cord through a  
 599 rotary joint commutator. After > 72h of habituation to the new cage and to tethered recording,  
 600 electrophysiology and photometry data were recorded continuously for 12 hours during light-phase  
 601 daytime hours while animals were undisturbed and behaving freely. To minimize bleaching and photo-  
 602 toxicity, LEDs were automatically disengaged for 30 minutes every 2 hours (90min ON/30min OFF).  
 603 **Auditory arousal threshold experiments.** Experiments (lasting on average ~10 hours, starting shortly  
 604 after light onset) were conducted in a double-wall sound-attenuating acoustic chamber (Industrial  
 605 Acoustics Company, Winchester, UK). Sounds were generated in TDT software, amplified (SA1,

606 Tucker Davis Technologies (TDT), and played free-field through a magnetic speaker (MF1, TDT)  
607 mounted 50cm above the animal. Sound intensities were measured by placing a Velleman DVM805  
608 Mini Sound Level Meter at the center of the cage floor. In arousal threshold experiments, broadband  
609 noise bursts (1s duration, either 65dB or 80dB SPL, order counterbalanced) were presented  
610 intermittently every 60s ( $\pm 0.5$  jitter) when mice ( $n=12$ ) were undisturbed. The sensitivity of the setup  
611 was confirmed by verifying that awakening probability was significantly higher for louder sounds ( $19.8$   
612  $\pm 8.4\%$  vs.  $8.1 \pm 2.6\%$  for 80dB vs. 65dB SPL sounds, respectively,  $p<0.001$ , paired t-test). The analysis  
613 presented in Figure 5H is based on the louder sound, for which there was a sufficient number of trials  
614 in both conditions (maintained sleep and awakening). Whenever COVID19 lockdown restrictions  
615 allowed ( $n=9/12$  animals), we performed two separate experimental sessions per animal.

616  
617 [Data and code availability](#): Full data and code used for creating the figures will be uploaded to a public  
618 repository prior to publication.

619

## 620 **Acknowledgments**

621 The authors would like to thank Dr. Rylan Larsen (Allen Institute), for generously gifting us an initial  
622 sample of AVV-fDIO-GCaMP6s, and Ege Yalcinbas (UCSD) for directing us towards the axon-  
623 targeted GCaMP. We also wish to thank Dr. Simon Musall (UCSD) for providing accessible code,  
624 allowing us to implement the linear encoding model. The authors appreciate the helpful critical  
625 comments of colleagues, members of the Citri lab, Gal Vishne, Dr. Eran Lottem and Profs. Inbal  
626 Goshen, Leon Deouell, Ayelet Landau, Adi Mizrahi and Mickey London on data, writing and  
627 presentation. Work in the Citri laboratory is funded by the European Research Council (ERC 770951),  
628 The Israel Science Foundation (1062/18, 393/12, 1796/12, and 2341/15), The Israel Anti-Drug  
629 Administration, EU Marie Curie (PCIG13-GA-2013-618201), the National Institute for Psychobiology  
630 in Israel, Hebrew University of Jerusalem Israel founded by the Charles E. Smith family (109-15-16),  
631 an Adelis Award for Advances in Neuroscience, the Brain and Behavior Foundation (NARSAD 18795),  
632 German–Israel Foundation (2299-2291.1/2011), and Binational Israel–United States Foundation  
633 (2011266), the Milton Rosenbaum Endowment Fund for Research in Psychiatry, a Prusiner-Abramsky  
634 Research Award in Basic Neuroscience, a seed grant from the Eric Roland Fund for interdisciplinary  
635 research administered by the ELSC, contributions from anonymous philanthropists in Los Angeles and  
636 Mexico City, as well as research support from the Safra Center for Brain Sciences (ELSC) and the  
637 Canadian Institute for Advanced Research (CIFAR). The Nir lab is supported by the European Research  
638 Council (ERC-2019-CoG 864353), the Israel Science Foundation (ISF, grants 1326/15 & 51/11 I-  
639 CORE cognitive sciences), and the Adelis Foundation.

640

## 641 References

642

- 643 1. Hernández Gómez, J. J., Marquina, V. & Gómez, R. W. On the performance of Usain Bolt in  
644 the 100 m sprint. *Eur. J. Phys.* **34**, 1227–1233 (2013).
- 645 2. Barrow, J. D. How Usain Bolt can run faster - effortlessly. *Significance* **9**, 9–12 (2012).
- 646 3. Yerkes, R. M. & Dodson, J. D. The relation of strength of stimulus to rapidity of habit-  
647 formation. *J. Comp. Neurol. Psychol.* **18**, 459–482 (1908).
- 648 4. Duffy, E. The psychological significance of the concept of ‘arousal’ or ‘activation’. *Psychol.*  
649 *Rev.* **64**, 265–275 (1957).
- 650 5. Esterman, M., Noonan, S. K., Rosenberg, M. & Degutis, J. In the zone or zoning out?  
651 Tracking behavioral and neural fluctuations during sustained attention. *Cereb. Cortex* **23**,  
652 2712–2723 (2013).
- 653 6. Kirszenblat, L. & van Swinderen, B. The Yin and Yang of Sleep and Attention. *Trends*  
654 *Neurosci.* **38**, 776–786 (2015).
- 655 7. Hayat, H. *et al.* Locus coeruleus norepinephrine activity mediates sensory-evoked awakenings  
656 from sleep. *Sci. Adv.* **6**, (2020).
- 657 8. Dalley, J. W., Cardinal, R. N. & Robbins, T. W. Prefrontal executive and cognitive functions  
658 in rodents: Neural and neurochemical substrates. in *Neuroscience and Biobehavioral Reviews*  
659 **28**, 771–784 (Pergamon, 2004).
- 660 9. Seeley, W. W. *et al.* Dissociable intrinsic connectivity networks for salience processing and  
661 executive control. *J. Neurosci.* **27**, 2349–2356 (2007).
- 662 10. Carlén, M. *What constitutes the prefrontal cortex?* *Science* **358**, (2017).
- 663 11. Buschman, T. J. & Miller, E. K. Top-down versus bottom-up control of attention in the  
664 prefrontal and posterior parietal cortices. *Science (80-. )*. **315**, 1860–1862 (2007).
- 665 12. Gent, T. C., Bandarabadi, M., Herrera, C. G. & Adamantidis, A. R. Thalamic dual control of  
666 sleep and wakefulness. *Nat. Neurosci.* **21**, 974–984 (2018).
- 667 13. Norimoto, H. *et al.* A claustrum in reptiles and its role in slow-wave sleep. *Nature* **578**, 413–  
668 418 (2020).
- 669 14. Narikiyo, K. *et al.* The claustrum coordinates cortical slow-wave activity. *Nat. Neurosci.* **23**,  
670 741–753 (2020).
- 671 15. Goll, Y., Atlán, G. & Citri, A. Attention: The claustrum. *Trends Neurosci.* **38**, 486–495  
672 (2015).
- 673 16. Edelman, L. R. & Denaro, F. J. The claustrum: a historical review of its anatomy, physiology,  
674 cytochemistry and functional significance. *Cell Mol Biol* **50**, 675–702 (2004).
- 675 17. Mathur, B. N. The claustrum in review. *Front. Syst. Neurosci.* **8**, 48 (2014).
- 676 18. Remedios, R., Logothetis, N. K. K. & Kayser, C. A role of the claustrum in auditory scene  
677 analysis by reflecting sensory change. *Front Syst Neurosci* **8**, 44 (2014).
- 678 19. Atlán, G. *et al.* The Claustrum Supports Resilience to Distraction. *Curr. Biol.* **28**, 2752–  
679 2762.e7 (2018).
- 680 20. Terem, A. *et al.* Claustral Neurons Projecting to Frontal Cortex Mediate Contextual  
681 Association of Reward. *Curr. Biol.* **30**, (2020).

- 682 21. Smith, J. B. *et al.* A role for the claustrum in salience processing? *Front. Neuroanat.* **13**, 19  
683 (2019).
- 684 22. Smythies, J., Edelstein, L. & Ramachandran, V. Hypotheses relating to the function of the  
685 claustrum. *Front. Integr. Neurosci.* **6**, (2012).
- 686 23. Jackson, J., Karnani, M. M., Zemelman, B. V., Burdakov, D. & Lee, A. K. Inhibitory Control  
687 of Prefrontal Cortex by the Claustrum. *Neuron* **99**, 1029–1039.e4 (2018).
- 688 24. Wang, Y. *et al.* Complete single neuron reconstruction reveals morphological diversity in  
689 molecularly defined claustral and cortical neuron types. *bioRxiv* (2019). doi:10.1101/675280
- 690 25. Zingg, B., Dong, H. W., Tao, H. W. & Zhang, L. I. Input–output organization of the mouse  
691 claustrum. *J. Comp. Neurol.* **526**, 2428–2443 (2018).
- 692 26. Atlan, G., Terem, A., Peretz-Rivlin, N., Groysman, M. & Citri, A. Mapping synaptic cortico-  
693 claustral connectivity in the mouse. *J. Comp. Neurol.* **525**, 1381–1402 (2017).
- 694 27. Wang, Q. *et al.* Organization of the connections between claustrum and cortex in the mouse.  
695 *Journal of Comparative Neurology* **525**, 1317–1346 (2017).
- 696 28. Reser, D. H. *et al.* Claustrum projections to prefrontal cortex in the capuchin monkey (*Cebus*  
697 *apella*). *Front Syst Neurosci* **8**, 123 (2014).
- 698 29. Sadowski, M., Morys, J., Jakubowska-Sadowska, K. & Narkiewicz, O. Rat’s claustrum shows  
699 two main cortico-related zones. *Brain Res* **756**, 147–152 (1997).
- 700 30. Remedios, R., Logothetis, N. K. & Kayser, C. Unimodal responses prevail within the  
701 multisensory claustrum. *J. Neurosci.* **30**, 12902–12907 (2010).
- 702 31. Olson, C. R. & Graybiel, A. M. Sensory maps in the claustrum of the cat. *Nature* **288**, 479–  
703 481 (1980).
- 704 32. Chia, Z., Augustine, G. J. & Silberberg, G. Synaptic Connectivity between the Cortex and  
705 Claustrum Is Organized into Functional Modules. *Curr. Biol.* **30**, 2777–2790.e4 (2020).
- 706 33. White, M. G. *et al.* Cortical hierarchy governs rat claustralcortical circuit organization. *J.*  
707 *Comp. Neurol.* **525**, 1347–1362 (2017).
- 708 34. Kim, J., Matney, C. J., Roth, R. H. & Brown, S. P. Synaptic Organization of the Neuronal  
709 Circuits of the Claustrum. *J. Neurosci.* **36**, 773–784 (2016).
- 710 35. Marriott, B. A., Do, A. D., Zahacy, R. & Jackson, J. Topographic gradients define the  
711 projection patterns of the claustrum core and shell in mice. *bioRxiv* 2020.09.11.293381 (2020).  
712 doi:10.1101/2020.09.11.293381
- 713 36. White, M. G. *et al.* The Mouse Claustrum Is Required for Optimal Behavioral Performance  
714 Under High Cognitive Demand. *Biol. Psychiatry* **88**, 719–726 (2020).
- 715 37. Gamberini, M. *et al.* Claustral Input to the Macaque Medial Posterior Parietal Cortex (Superior  
716 Parietal Lobule and Adjacent Areas). *Cereb. Cortex* **0**, 1–17 (2021).
- 717 38. Reus-García, M. M. *et al.* The Claustrum is Involved in Cognitive Processes Related to the  
718 Classical Conditioning of Eyelid Responses in Behaving Rabbits. *Cereb. Cortex* **31**, 281–300  
719 (2021).
- 720 39. Tervo, D. G. R. *et al.* A Designer AAV Variant Permits Efficient Retrograde Access to  
721 Projection Neurons. *Neuron* **92**, 372–382 (2016).
- 722 40. Milstein, J. A., Dalley, J. W. & Robbins, T. W. in *Neurobiology of Attention* 57–62 (Elsevier  
723 Inc., 2005). doi:10.1016/B978-012375731-9/50014-8

- 724 41. Musall, S., Kaufman, M. T., Juavinett, A. L., Gluf, S. & Churchland, A. K. Single-trial neural  
725 dynamics are dominated by richly varied movements. *Nat. Neurosci.* **22**, 1677–1686 (2019).
- 726 42. Stringer, C. *et al.* Spontaneous behaviors drive multidimensional, brainwide activity. *Science*  
727 (80-). **364**, (2019).
- 728 43. Soltani, S. *et al.* Sleep–Wake Cycle in Young and Older Mice. *Front. Syst. Neurosci.* **13**, 51  
729 (2019).
- 730 44. Franken, P., Chollet, D. & Tafti, M. The homeostatic regulation of sleep need is under genetic  
731 control. *J. Neurosci.* **21**, 2610–2621 (2001).
- 732 45. Buzsáki, G. *Rhythms of the Brain. Rhythms of the Brain* (2009).  
733 doi:10.1093/acprof:oso/9780195301069.001.0001
- 734 46. Fodoulian, L. *et al.* The claustrum-medial prefrontal cortex network controls attentional set-  
735 shifting. *bioRxiv* 2020.10.14.339259 (2020). doi:10.1101/2020.10.14.339259
- 736 47. Crick, F. C. & Koch, C. What is the function of the claustrum? *Philos Trans R Soc L. B Biol*  
737 *Sci* **360**, 1271–1279 (2005).
- 738 48. Chia, Z., Silberberg, G. & Augustine, G. J. Functional properties, topological organization and  
739 sexual dimorphism of claustrum neurons projecting to anterior cingulate cortex. *Claustrum* **2**,  
740 1357412 (2017).
- 741 49. Graf, M., Nair, A., Wong, K. L. L., Tang, Y. & Augustine, G. J. Identification of mouse  
742 claustral neuron types based on their intrinsic electrical properties. *eNeuro* **7**, 1–29 (2020).
- 743 50. Nair, A., Teo, Y. Y., Graf, M. & Augustine, G. J. A functional logic for neurotransmitter co-  
744 release in the cholinergic forebrain pathway. **1481**, (2021).
- 745 51. Mathur, B. N., Caprioli, R. M. & Deutch, A. Y. Proteomic analysis illuminates a novel  
746 structural definition of the claustrum and insula. *Cereb. Cortex* **19**, 2372–2379 (2009).
- 747 52. Luo, Y., Weibman, D., Halperin, J. M. & Li, X. A review of heterogeneity in attention  
748 deficit/hyperactivity disorder (ADHD). *Frontiers in Human Neuroscience* **13**, 42 (2019).
- 749 53. Cornblatt, B. A. & Malhotra, A. K. Impaired attention as an endophenotype for molecular  
750 genetic studies of schizophrenia. *Am. J. Med. Genet. - Neuropsychiatr. Genet.* **105**, 11–15  
751 (2001).
- 752 54. Cascella, N. G. & Sawa, A. in *The Claustrum* (eds. Smythies, J. R., Edelman, L. R. &  
753 Ramachandran, V. S.) 237–243 (Academic Press, 2014). doi:http://dx.doi.org/10.1016/B978-  
754 0-12-404566-8.00009-X
- 755 55. Chase, T. N. Apathy in neuropsychiatric disease: Diagnosis, pathophysiology, and treatment.  
756 *Neurotox. Res.* **19**, 266–278 (2011).
- 757 56. Ashwood, Z. C. *et al.* Mice alternate between discrete strategies during perceptual decision-  
758 making. *bioRxiv* 2020.10.19.346353 (2020). doi:10.1101/2020.10.19.346353
- 759 57. Tiego, J., Testa, R., Bellgrove, M. A., Pantelis, C. & Whittle, S. A hierarchical model of  
760 inhibitory control. *Front. Psychol.* **9**, 1339 (2018).
- 761 58. Leinweber, M., Ward, D. R., Sobczak, J. M., Attinger, A. & Keller, G. B. A Sensorimotor  
762 Circuit in Mouse Cortex for Visual Flow Predictions. *Neuron* **95**, 1420–1432.e5 (2017).
- 763 59. Small, D. M. *et al.* The posterior cingulate and medial prefrontal cortex mediate the  
764 anticipatory allocation of spatial attention. *Neuroimage* **18**, 633–641 (2003).
- 765 60. Verbruggen, F. & Logan, G. D. Response inhibition in the stop-signal paradigm. *Trends in*  
766 *Cognitive Sciences* **12**, 418–424 (2008).



- 767 61. Zhang, S. *et al.* Long-range and local circuits for top-down modulation of visual cortex  
768 processing. *Science* (80-. ). **345**, 660–665 (2014).
- 769 62. Keller, G. B. & Mrsic-Flogel, T. D. Predictive Processing: A Canonical Cortical Computation.  
770 *Neuron* **100**, 424–435 (2018).
- 771 63. Kim, H., Ährlund-Richter, S., Wang, X., Deisseroth, K. & Carlén, M. Prefrontal Parvalbumin  
772 Neurons in Control of Attention. *Cell* **164**, 208–218 (2016).
- 773 64. Monto, S., Palva, S., Voipio, J. & Palva, J. M. Very slow EEG fluctuations predict the  
774 dynamics of stimulus detection and oscillation amplitudes in humans. *J. Neurosci.* **28**, 8268–  
775 8272 (2008).
- 776 65. Nir, Y. *et al.* Regional Slow Waves and Spindles in Human Sleep. *Neuron* **70**, 153–169  
777 (2011).
- 778 66. Nir, Y. *et al.* Selective neuronal lapses precede human cognitive lapses following sleep  
779 deprivation. *Nat. Med.* **23**, 1474–1480 (2017).
- 780 67. Franklin, K. B. J. & Paxinos, G. *The mouse brain in stereotaxic coordinates. Fourth edition.*  
781 (2013).
- 782 68. Carpenter, A. E. *et al.* CellProfiler: image analysis software for identifying and quantifying  
783 cell phenotypes. *Genome Biol* **7**, R100 (2006).
- 784 69. Kamnitsky, L. *et al.* Improved structure, function and compatibility for cellprofiler: Modular  
785 high-throughput image analysis software. *Bioinformatics* **27**, 1179–1180 (2011).
- 786 70. Ho, J., Tumkaya, T., Aryal, S., Choi, H. & Claridge-Chang, A. Moving beyond P values: data  
787 analysis with estimation graphics. *Nature Methods* **16**, 565–566 (2019).

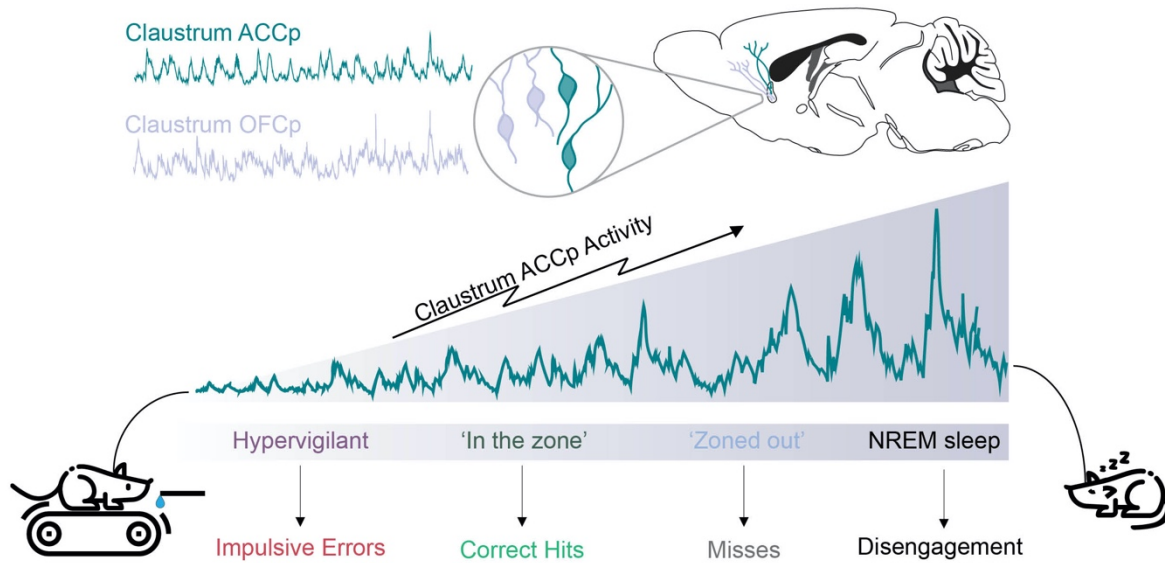

**Figure S1.** Increased ACCp activity is associated with reduced engagement during behavior and in sleep. Optimal ‘in the zone’ performance requires a defined, moderate, level of ACCp activity (Figures 2-4). At low ACCp activity levels, mice tend to perform impulse errors in the response to the trial onset BBN, rather than withhold their response in anticipation of the ‘go’ cue. At high ACCp activity levels, mice tend to ‘zone out’ and miss trials. Furthermore, even higher levels of ACCp activity are associated with ‘miss streaks’, in which the mice do not engage with the task over multiple minutes. Finally, during sleep, cortical slow-wave EEG is correlated with increased ACCp activity, and the propensity of mice to awake from NREM sleep following tone stimulations decreases as a function of ACCp activity (Figure 5).

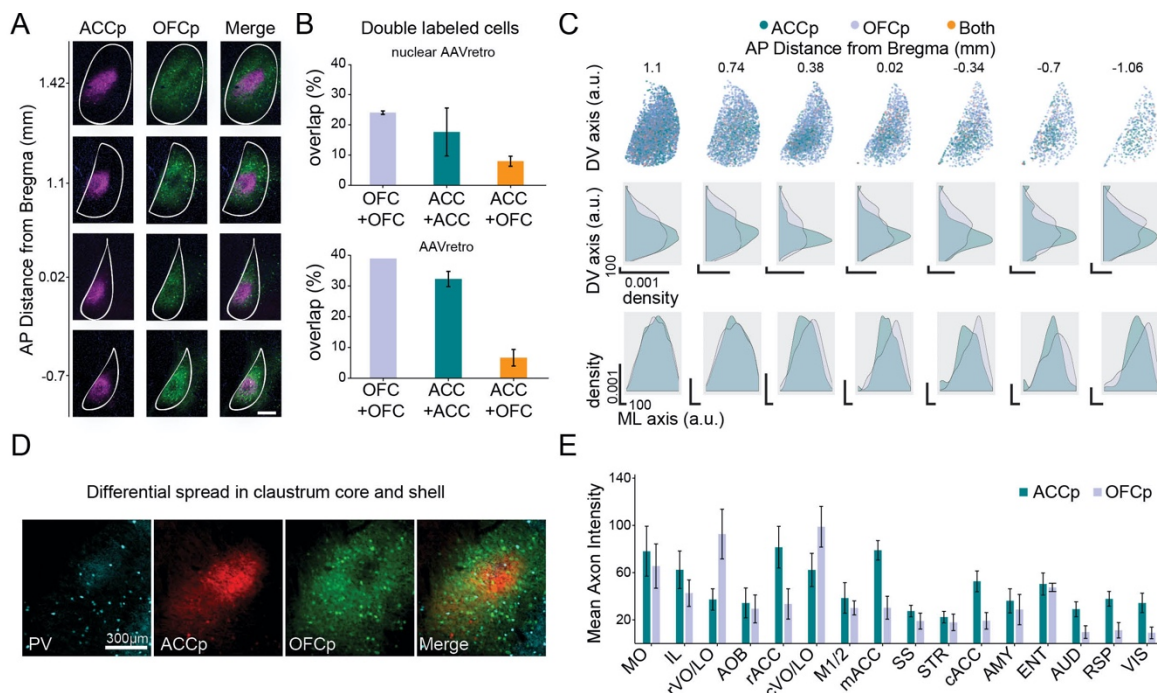

**Figure S2.** Anatomical distinction of ACCp and OFCp claustral populations. (A) Differential localization of claustral ACCp and OFCp networks (labeled by retro-labeling ACC- vs OFC- projecting cells with cytoplasmic tdTomato vs eGFP expression) in several planes along the anterior-posterior claustrum axis. Scale bar represents 100 $\mu$ m. (B) Quantification of overlap (percent of all labelled cells) using nuclear-localized (H2B-fused; top) or cytoplasmically-diffuse (bottom) expression of fluorophores driven by retro-AAVs co-injected to the same cortical target vs. different cortical regions. (C) Data overlaid from 7 mice showing spread of ACCp and OFCp neurons (top panels) and their respective density distributions along the dorso-ventral (DV; middle panels) or medio-lateral (ML; lower panels) axes of the claustrum. (D) Localization of ACCp neurons in the claustrum core, identified by parvalbumin (PV) immunostaining, vs relatively sparse distribution of OFCp network signal within this ‘core’ patch. (E) Quantification of axonal intensity by brain region for ACCp or OFCp neurons following anti-GFP immunostaining (expanded data from Figure 1E, see methods). Glossary: MO – Medial orbital cortex; IL – Infralimbic cortex; rVOLO – ventral orbital cortex, rostral; AO – Anterior olfactory nucleus; rACC – Anterior cingulate cortex, rostral, cVO/LO – Orbitofrontal cortex, caudal; M1/2 – Motor cortex; mACC – Anterior cingulate cortex, middle; SS – Somatosensory cortex; STR – Striatum; cACC – Anterior cingulate cortex, caudal; AMY – amygdala; ENT – entorhinal cortex; AUD – Auditory cortex; RSP – Retrosplenial cortex; VIS – Visual cortex. Data in Figure 1E shows averaged axonal density in ACC (r, m, and c), OFC (r and c VOLO), and sensory cortex (AUD, RSP and VIS).

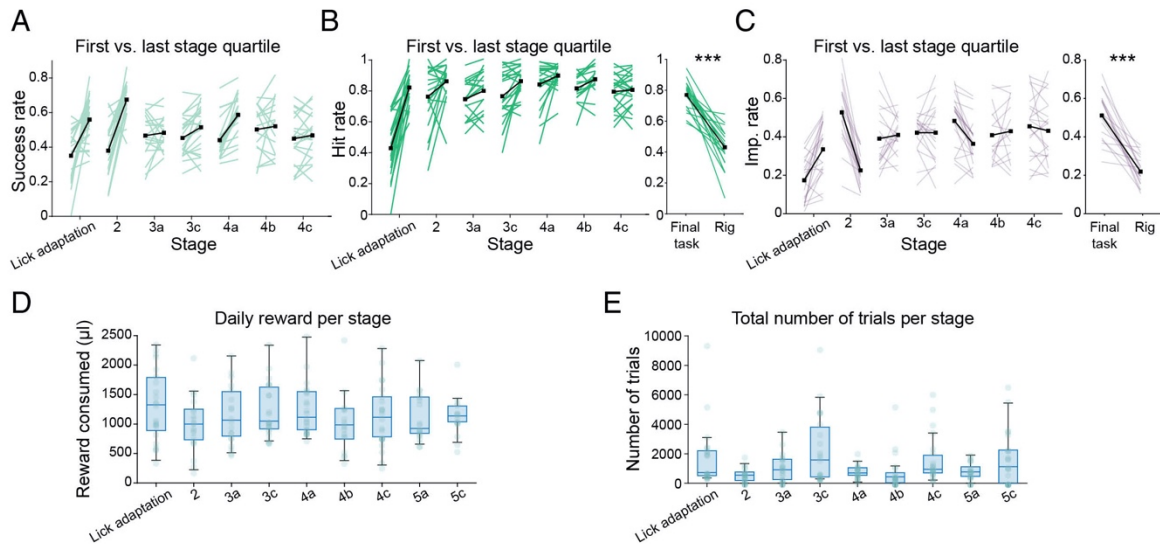

**Figure S3. Performance metrics during automated behavioral training.** (A) Overall success rate during automated training. Points represent performance in the first and last quartiles of each stage. Black lines represent group averages. Training stages proceed from lick adaptation (cue initiated upon port entry; 1.5 second reward window; all trials include visual aid - AudVis); Stage 2: addition of delay prior to cue (random delay of 0.5-2 sec); Stage 3: lengthened delay (0.75-3s) and gradual increase in difficulty by removal of visual aid in three steps, 30% (Stage 3a), 50% (Stage 3b), and 70% (stage 3c) trials are purely auditory (Aud). In stage 4 a tone-cloud distractor was added. Stage 4a comprised of 70% auditory-visual trials with the cloud (AudVisCloud). Stage 4b included 50% AudVisCloud trials, 20% auditory cloud trials (AudCloud), 15% Aud trials and 15% AudVis trials. After mice were familiar with the cloud in both visual and non-visual trials, we proceeded to stage 4c, and increased the rate of AudCloud trials to 65%, while the rest of the trials comprised of 15% AudVisCloud, 15% Aud, and 5% AudVis. Finally, in stage 5, 3 additional attenuations of the target cue were introduced. In stage 5a to 30% of the trials, in stage 5b to 50% of the trials, and in stage 5c to 100% percent of the trials (success rate in the full task during training is shown in Figure 2C). (B) As in A, for hit rate (excluding impulsive trials). Right panel summarizes the hit rate in the full task during training compared to the head-fixed recordings. The increase in missed trials reflects the change from a self-paced task to a constant 20 second inter-trial interval. (C) As in A, B for impulsive errors, which were far less prominent during head-fixed recordings (potentially reflecting reduced competition for the port compared to the group-housed automated training). (D) Daily reward consumption during training stages. (E) Number of trials in each stage. Box plots in (D) and (E) represent group median and 1st and 3rd quartiles. Dots represent individual mice. Unless noted otherwise, data are mean  $\pm$  s.e.m. \* $p < 0.05$ , \*\* $p < 0.01$ , \*\*\* $p < 0.001$ ; n.s., not significant. See Supplementary Table 3 for further details of the statistical analyses.

789

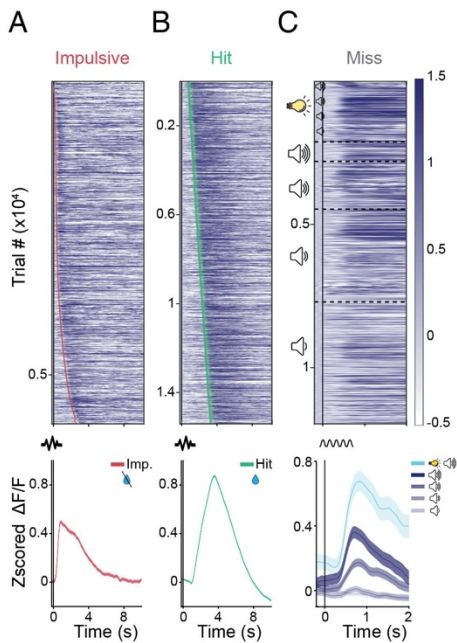

**Figure S4. OFCp activity is recruited following licks and cues but not trial onset.** Top: All OFCp trials for impulsive (A,  $n=5,835$ ), hit (B,  $n=15,409$ ), and miss (C,  $n=12,815$ ) trials from  $n=10$  mice, sorted according to lick onset (impulsive); delay from trial onset to cue (hits); or cue intensity (miss). Red and green ticks indicate the first impulsive or correct lick within the trial, respectively. Bottom: mean activity traces in impulsive (left) hit (middle) and miss trials (right, separated by cue intensity). Shaded area represents SEM. The vertical black line indicates trial onset (for impulsive & hit trials) or cue (for miss trials).

790

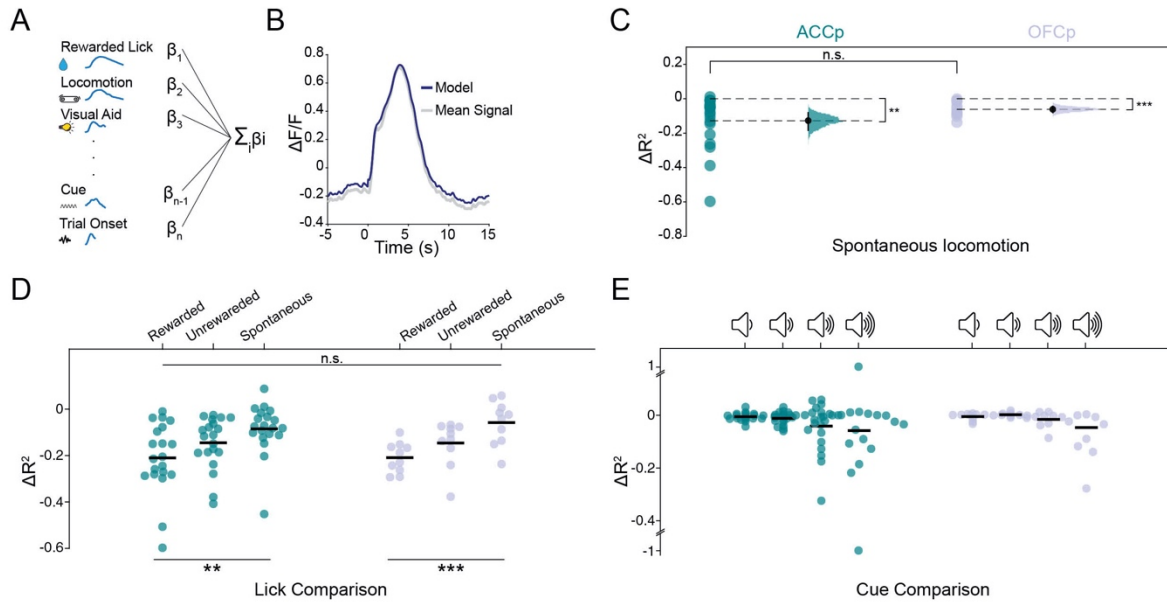

**Figure S5.** A linear encoding model for quantification of the claustral representation of task parameters Time-event kernels (A) are linearly summed to generate a prediction for the average neural signal (B). See Figure 2 and supplementary table T2 for the full list of labels. (C) Model quantification of the unique contribution of claustrum activity during spontaneous locomotion events (ACCp n=20; OFCp n=10). Data is shown as individual channels and bootstrapped distribution of means with 95% confidence intervals. (D-E) Model quantification of the unique contribution of claustrum activity during licking events (D) and go-cue stimuli (E) in ACCp and OFCp signals. Unless noted otherwise, data are mean  $\pm$  s.e.m. \* $p < 0.05$ , \*\* $p < 0.01$ , \*\*\* $p < 0.001$ ; n.s., not significant. See Supplementary Table 3 for further details of the statistical analyses.

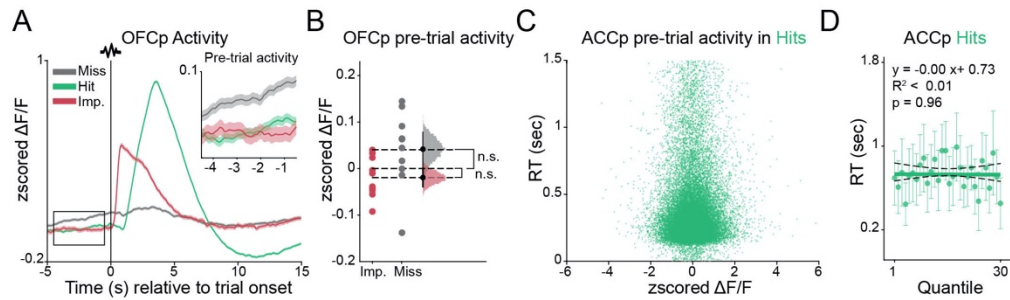

**Figure S6.** OFCp pre-trial activity is not correlated with performance. (A) Mean activity of all OFCp claustrum recordings (n=10) aligned to trial onset, divided by trial outcome. Inset depicts 5 seconds of pre-trial activity. (B) OFCp pre-trial baseline activity in impulsive trials (red) and miss trials (gray), depicted as individual mice and bootstrapped distribution of means with 95% confidence intervals (n=10). (C) Response time in hits as a function of ACCp pre-trial activity (n=20). (D) Response time in ACCp mice (n=20) is uncorrelated with pre-trial activity. Thick line represents linear fit, dotted lines represent 95% confidence intervals. Unless noted otherwise, data are mean  $\pm$  s.e.m. \* $p < 0.05$ , \*\* $p < 0.01$ , \*\*\* $p < 0.001$ ; n.s., not significant. See Supplementary Table 3 for further details of the statistical analyses.

791

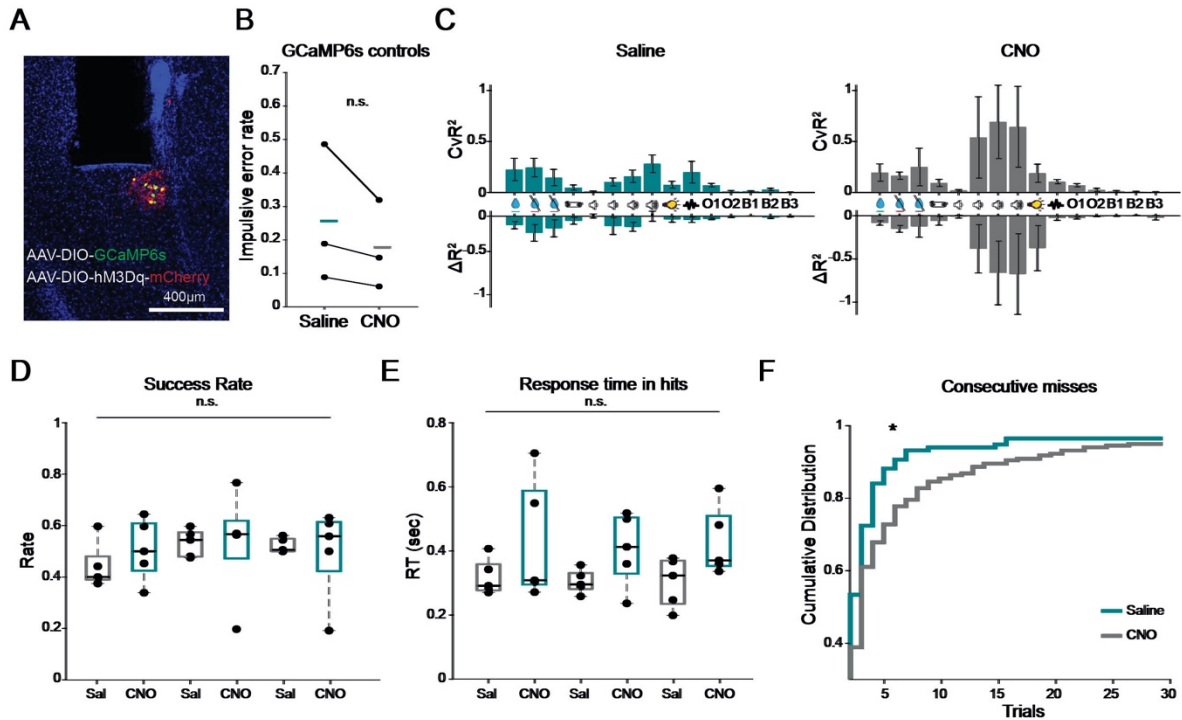

**Figure S7.** The effect of ACCp chemogenetic activation is specific, and does not affect transient responses to task events, while enhancing consecutive misses late in the session. (A) Expression of GcAMP6s (green) and hM3Dq (red) in ACCp neurons. (B) CNO had no effect on impulsive errors in GCaMP6s control mice ( $n=3$ ). (C) Model quantification of the contribution of behavioral events to claustrum photometry signals in saline (left) or CNO (right) sessions ( $n=5$  mice, 3 sessions of each condition per mouse). (D) Success rates of ACCp-hM3Dq expressing mice throughout the experiment were not affected by CNO. (E) Response time in hit trials throughout the experiment were not affected by CNO. Boxes in (D, E) represent group median and 1st and 3rd quartiles, session order as in Figure 3D. (F) Cumulative probability distribution of consecutive miss trials in saline (turquoise) and CNO (gray) sessions. Unless noted otherwise, data are mean  $\pm$  s.e.m. \* $p < 0.05$ , \*\* $p < 0.01$ , \*\*\* $p < 0.001$ ; n.s., not significant. See Supplementary Table 3 for further details of the statistical analyses.

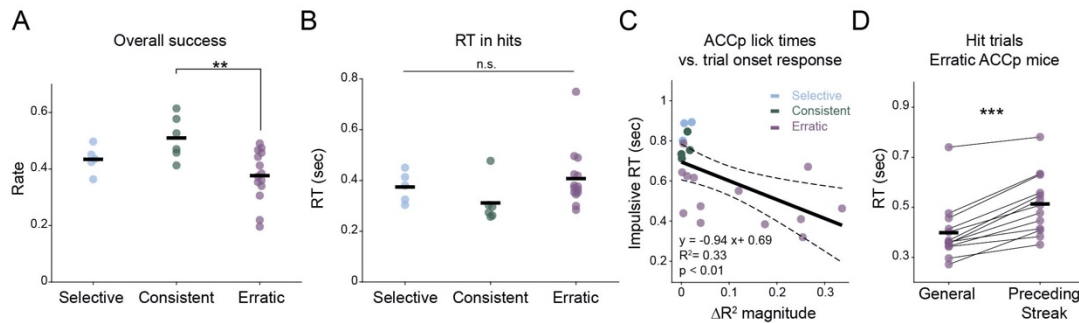

**Figure S8.** Erratic mice exhibit an overall lower success rate, and increased reaction time prior to miss streaks. (A) Overall success rate in the task by strategy group ( $n = 5$  selective; 6 consistent; 14 erratic). (B) No relation of reaction time in hit trials to strategy group. (C) Mean response time in impulsive errors (Figure 4E) as a function of the model quantification for trial onset ACCp activity (Figure 4F). Colors represent strategy group ( $n = 3$  selective; 4 consistent; 13 erratic). Thick line represents linear fit, dotted lines represent 95% confidence intervals. (D) Response time for erratic ACCp mice ( $n=13$ ) is increased in hit trials immediately preceding miss streaks, compared to all hit trials. Unless noted otherwise, data are mean  $\pm$  s.e.m. \* $p < 0.05$ , \*\* $p < 0.01$ , \*\*\* $p < 0.001$ ; n.s., not significant. See Supplementary Table 3 for further details of the statistical analyses.

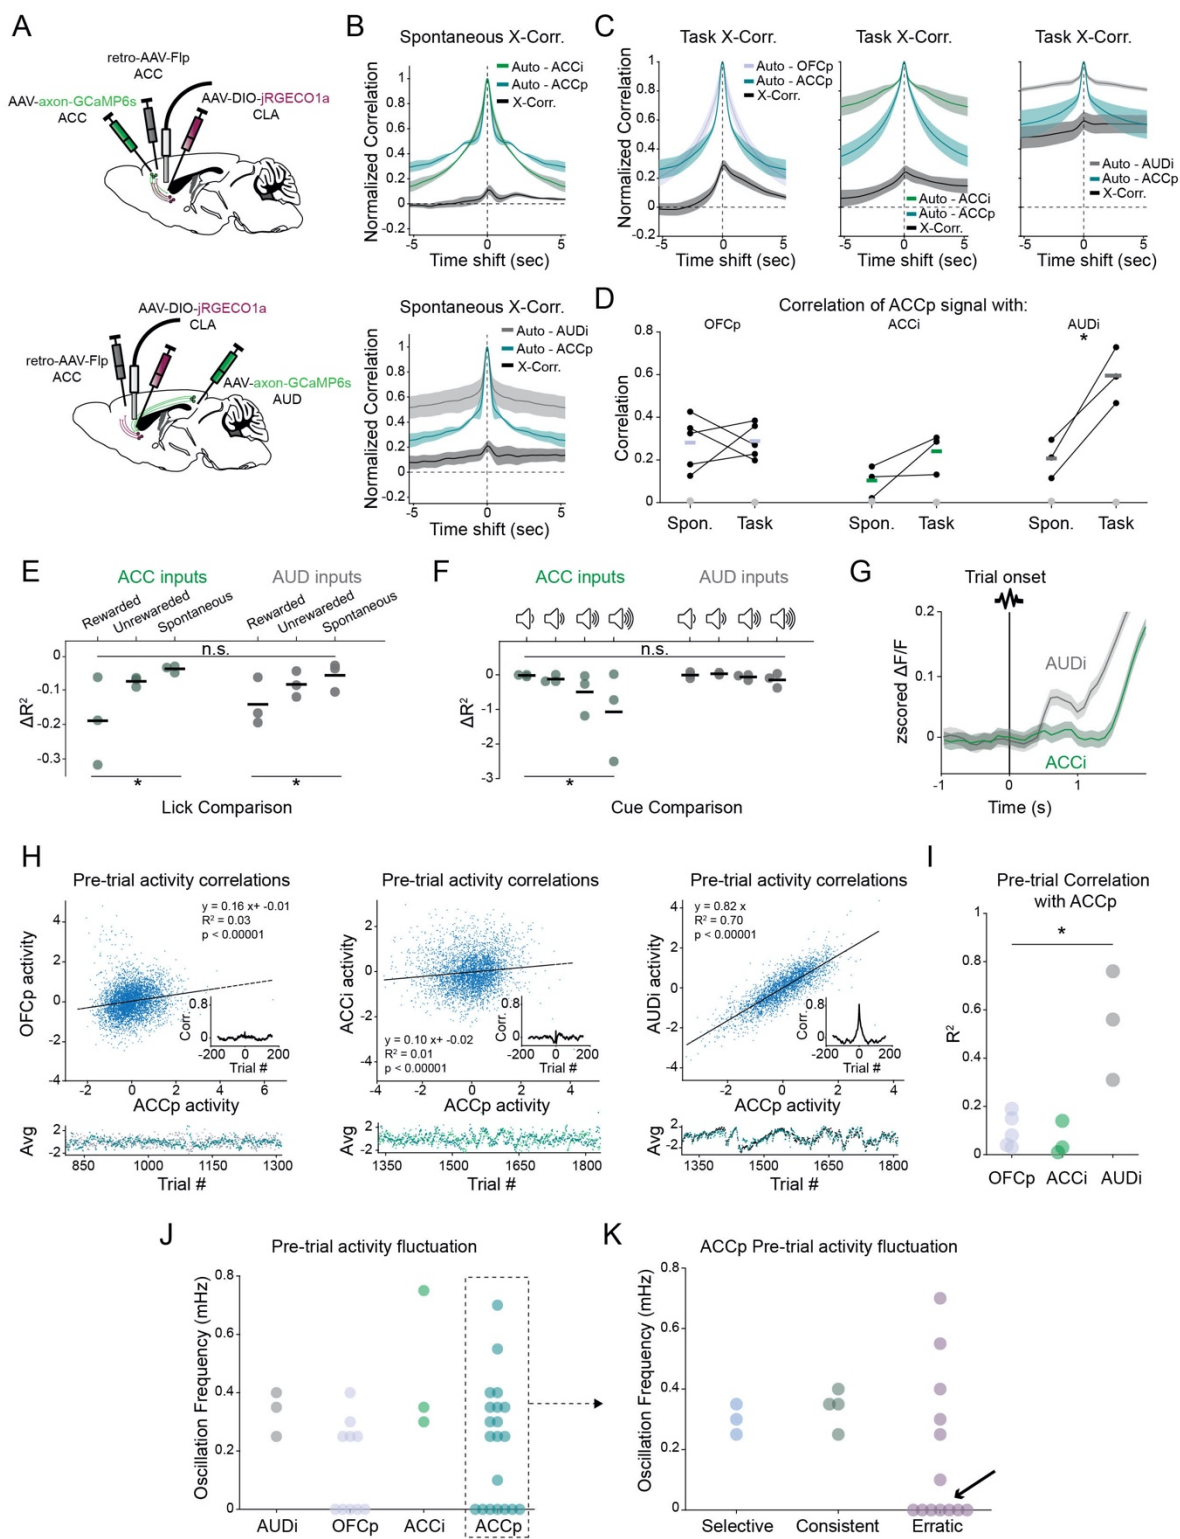

792

**Figure S9. Claustral inputs from auditory cortex acquire task-dependent correlations with ACCp.** (A) Strategy for simultaneous recording from claustrum ACCp neurons expressing jRGECO1a, together with activity of claustrum afferents from ACC (ACCi; top) or AUD (AUDi; bottom) axons, using axonal-targeted GCaMP6s. (B) Average autocorrelations of ACCi/ACCp or AUDi/ACCp spontaneous activity, and respective cross-correlations between channels (n=3 mice in each group). (C) Average autocorrelations of ACCp/OFCp (left), ACCi/ACCp (middle) or AUDi/ACCp (right) activity during task recordings, as well as cross-correlations between channels (n = 5, 3, 3 mice, respectively). (D) Summary of overall correlations between channel activity during free recordings (spontaneous) compared to those recorded during the task (n=5, 3, 3 mice for each group), demonstrating an increase in correlated activity between AUDi and ACCp networks during the task. Gray dots represent the maximal correlation of shuffled data over 1000 iterations per mouse, averaged across mice. (E-G) Model quantification of ACC (ACCi) and auditory (AUDi) cortical inputs to the claustrum. (E-F) Quantification of the contribution of activity during licking events (E) and go cue stimuli (F) to the overall signal. (G) Average trace from all axonal recordings in ACCi (green) vs AUDi (gray), aligned to trial onset, depicting trial onset responses in AUDi, and their absence in ACCi activity. (H-K) Pre-trial activity dynamics. (H) Correlation of average pre-trial activity (5s preceding trial onset) in representative co-recorded ACCp/OFCp (left), ACCp/ACCi (middle), or ACCp/AUDi (right) channels. Inset depicts cross-correlation in a window spanning 400 trials. Bottom panel depicts the magnitudes of pre-trial ACCp activity and corresponding OFCp, ACCi or AUDi activity during individual consecutive trials in a representative session. (I) Coefficient of determination (R-squared) of the linear fit between pre-trial activity (5s prior to trial onset) in co-recorded channels. (J) Frequency of ultra-slow oscillations of pre-trial activity in ACCp (n=20), OFCp (n=10), ACCi (n=3) and AUDi (n=3) recordings. Oscillation frequency was defined as the peak of the frequency spectrum emerging above a threshold obtained from 1000 shuffles of the data (see Methods). (K) Division of pre-trial ultra-slow fluctuations in ACCp mice according to strategy (see Figure 4). Arrow points to mice with no significant oscillation, all associated with the erratic group. Unless noted otherwise, data are mean  $\pm$  s.e.m. \*p < 0.05, \*\*p < 0.01, \*\*\*p < 0.001; n.s., not significant. See Supplementary Table 3 for further details of the statistical analyses.

793

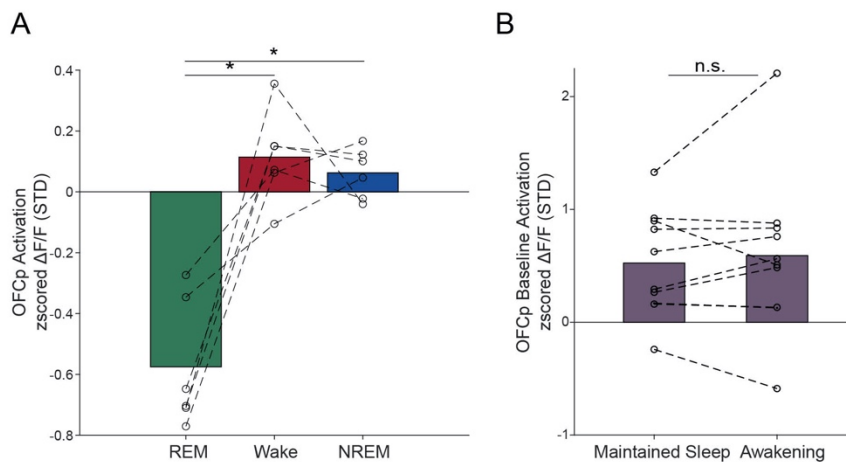

**Figure S10. Claustral OFCp activity during sleep.** (A) Average OFCp claustrum calcium activity in REM sleep, wake, and NREM sleep (n=6). Note that in this population, activity during NREM sleep is not higher than in wakefulness. (B) OFCp baseline activity (y-axis) for trials associated with maintained sleep (left) vs. awakening (right). Each dot represents a separate ~10h experiment (10 experiments in n=6 mice). Unless noted otherwise, data are mean  $\pm$  s.e.m. \*p < 0.05, \*\*p < 0.01, \*\*\*p < 0.001; n.s., not significant. See Supplementary Table 3 for further details of the statistical analyses.

## 794 **Figure Legends**

795 **Figure 1. Differential claustrum networks project to ACC vs OFC.** (A) Scheme for dual-color soma-  
796 targeted retrograde labelling of claustrum projection neurons. (B) Example expression of H2B-GFP in  
797 ACC-projecting neurons (ACCp; left); H2B-tdTomato in OFC-projecting neurons (OFCp; middle); and  
798 double-labeled neurons (right; white arrows). (C) Digitized overlap of all neurons from a single coronal  
799 plane (+0.38mm relative to Bregma) over all mice (n=3), and their distribution of expression along the  
800 dorsoventral axis of the claustrum (right). Dark gray indicates double-labeled cells. (D) IHC-amplified  
801 GFP-labelled ACCp (left) or OFCp (right) axonal projections within ACC (top) and OFC (bottom). See  
802 (F) for viral approach. (E) Mean fluorescence intensity in ACCp (n=4 mice) and OFCp (n=3 mice)  
803 projections. (F) Approach for fiber photometry recordings from ACCp (top) vs OFCp (bottom)  
804 claustrum populations. Middle panels depict representative histological expression and optic fiber  
805 placement. Right panels depict spontaneous activity in head-restrained mice. (G) Quantification of  
806 spontaneous calcium event rate, width (at half maximal prominence), amplitude, and overall median  
807 absolute deviation (MAD) of ACCp vs OFCp (n=5 mice in each group) z-scored  $\Delta F/F$ . (H) Approach  
808 for simultaneous recording from ACCp and OFCp neurons using two-color photometry. (I)  
809 Representative spontaneous photometry traces from an ACCp/OFCp mouse. (J) Correlation between  
810 spontaneous co-activity in ACCp/OFCp mice (n=5). Light gray dot represents the maximal correlation  
811 over 1000 iterations of shuffled data per mouse, averaged across mice. (K) Average cross-correlation  
812 of spontaneous activity in ACCp/OFCp mice (gray, n=5) in comparison to the auto-correlations of  
813 OFCp (purple) and ACCp (turquoise). Unless noted otherwise, data are mean  $\pm$  s.e.m. \*p < 0.05,  
814 \*\*p < 0.01, \*\*\*p < 0.001; n.s., not significant. See Supplementary Table 3 for further details of  
815 statistical analyses.

816 **Figure 2. Differential correlation of ACCp vs OFCp activity with trial outcome.** (A) Scheme  
817 describing the ENGAGE task. Trial onset was indicated by a 100ms broadband noise. Mice were  
818 rewarded for timely responses following Go cue initiation ('hit'). Impulse errors were defined as licks  
819 between trial onset to the Go cue, while 'miss' trials included trial omissions and late licks. (B)  
820 Distribution of trial parameters. (C) Co-housed cohorts of mice (n=23 mice in 7 cages) were trained in  
821 an automated home-cage system (see Methods), allowing individualized training schemes based on  
822 RFID identification. Success rate transferred from training to subsequent head-fixed recording sessions.  
823 (D) Distribution of impulsive vs miss error rates in the task during head-fixed recording sessions. (E)  
824 Mean hit rate (excluding impulsive errors) as a function of cue intensity during recording (~80,000 total  
825 individual trials). Inset depicts impulse errors, which increased in the presence of the tone cloud. (F-H)  
826 ACCp claustrum dynamics during impulsive (F, n=12,471), hit (G, n=26,243) and miss (H, n=23,430)  
827 trials aligned to trial onset (F-G) or cue presentation (H). Top: Single trial examples. Red and green  
828 lines indicate impulsive or correct licks, respectively. Heatmaps: all ACCp trials from n=20 mice, sorted  
829 by lick onset (impulsive); the delay from trial onset to cue (hits); or cue intensity (miss). Ticks indicate  
830 the first impulsive or correct lick within the trial, respectively. Bottom: mean activity traces in impulsive  
831 (left) hit (middle) and miss trials (right, separated by cue intensity). (I) Quantification of the contribution  
832 of behavioral events to claustrum photometry signal (n=20 ACCp channels, n=10 OFCp channels) using  
833 a linear encoding model (see Methods and supplementary table T2).  $CvR^2$ : cross-validated explained  
834 variance in a single variable model compared to the full model.  $\Delta R^2$ : unique contribution of a label to  
835 the model measured by net loss in explained variance. (J) Averaged ACCp (left, n=20 channels) and  
836 OFCp (right, n=10 channels) traces around trial onset. (K) Model quantification of the representation  
837 of trial onset. Data is presented as individual mice with bootstrapped distribution of means, and 95%  
838 confidence intervals. (L) Mean activity of all ACCp recordings (n=20) aligned to trial onset, separated  
839 by trial outcome. Inset depicts pre-trial activity. (M) Mean pre-trial activity preceding impulsive (red)  
840 or miss (gray) errors (individual mice with bootstrapped distribution of means and 95% confidence  
841 intervals). (N-Q) Normalized impulsive (N,P) or miss (O,Q) error rate, as a function of pre-trial activity  
842 quantiles for ACCp (N,O; n=20) or OFCp (P,Q; n=10) data. Thick line represents linear fit, dotted lines



843 represent 95% confidence intervals. Unless noted otherwise, data are mean  $\pm$  s.e.m. \* $p < 0.05$ ,  
844 \*\* $p < 0.01$ , \*\*\* $p < 0.001$ ; n.s., not significant. See Supplementary Table 3 for further details of the  
845 statistical analyses.

846 **Figure 3. Chemogenetic facilitation of ACCp activity diminishes impulsive behavior.** (A)  
847 Approach for simultaneous chemogenetic activation and recording of ACCp activity. (B) Example  
848 recordings of spontaneous activity from an ACCp mouse following saline (turquoise) or CNO (gray)  
849 administration. (C) Average spontaneous calcium signal following saline vs CNO (10mg/kg i.p.)  
850 administration (n=5 mice). (D) Comparison of impulsive errors in interleaved daily sessions of saline  
851 vs CNO, normalized to the average rate over 3 prior days of saline habituation (n=5 mice). (E) Binned  
852 histograms (vertical lines) and kernel fit (smooth horizontal lines) of the distribution of trial outcome  
853 within saline (left) vs CNO (right) sessions (n=3 sessions/each from 5 mice; 360 trials/session). Unless  
854 noted otherwise, data are mean  $\pm$  s.e.m. \* $p < 0.05$ , \*\* $p < 0.01$ , \*\*\* $p < 0.001$ ; n.s., not significant. See  
855 Supplementary Table 3 for further details of the statistical analyses.

856 **Figure 4. ACCp activity corresponds to individual differences in behavioral strategies.** (A)  
857 Individual mice are plotted according to their modulation indices depicting the dependency of  
858 individual hit rates on cue intensity (cue modulation index), cloud (cloud modulation index), or visual  
859 aid (visual modulation index, represented by the shading of the dots). Mice (n=25) were grouped into  
860 three groups, based on their strategy in the task ('selective'= cue modulation index > 0.5; 'consistent'=  
861 cloud modulation index < 0.04 & 'erratic'; n=5, 6, 14, respectively). (B) Psychometric curves of  
862 representative mice from each group (dotted frames in A). (C) Impulse error rate in absence or presence  
863 of the tone-cloud, by behavioral group. (D) Distribution of impulsive lick response times. Dotted lines  
864 indicate distribution medians. Inset depicts all trials as a function of the random delay period. (E)  
865 Representation of trial onset in the ACCp signal. Top: Average responses in representative ACCp  
866 signals. Bottom: Model quantification of trial onset response. Individual mice (n=3, 4, 13) and  
867 bootstrapped distribution of means with 95% confidence intervals. (F) Mean activity in ACCp  
868 recordings from erratic mice (n=13) aligned to trial onset, separated by outcome. Inset depicts pre-trial  
869 activity. (G) In *erratic* mice the ACCp activity preceding impulsive errors is low, while ACCp activity  
870 preceding miss trials is high. Individual mice and bootstrapped distribution of means with 95%  
871 confidence intervals. (H-I) Normalized impulse (H) or miss (I) error rate, as a function of pre-trial  
872 activity of ACCp in erratic mice. Thick line represents linear fit, dotted lines represent 95% confidence  
873 intervals. (J) Cumulative distribution of consecutive miss trials for each behavioral group. Unless noted  
874 otherwise, data are mean  $\pm$  s.e.m. \* $p < 0.05$ , \*\* $p < 0.01$ , \*\*\* $p < 0.001$ ; n.s., not significant. See  
875 Supplementary Table 3 for further details of the statistical analyses.

876 **Figure 5. Claustral ACCp activity is tied to deeper NREM sleep.** (A) Top: Diagram of experimental  
877 setup for recording from a freely behaving mouse in its home-cage under video surveillance, in the  
878 presence of a speaker for tone presentations. Bottom: Simultaneous monitoring of frontal and parietal  
879 EEG, neck EMG, and fiber photometry from ACCp or OFCp claustral neurons. (B) Representative  
880 hypnogram (time-course of sleep/wake states). Each black tick marks a single 4s data epoch. W – wake;  
881 N – NREM; R-REM. (C) Representative traces of frontal (F) and parietal (P) EEG (top), EMG (middle),  
882 and ACCp GCaMP6s (bottom) signals during REM (left), wake (middle), and NREM (right). For ACCp  
883 signal, horizontal gray line represents 0 of the zscored df/f. Black vertical calibration bars in the utmost  
884 right represent 1mV (EEG & EMG) and 1std (GCaMP). Black horizontal calibration bar in the bottom  
885 right corner represents 1s. (D) Representative scatter plot distribution of EMG root mean square (y-  
886 axis) versus frontal EEG power distribution (ratio between power in high [ $> 25$ Hz] versus low [ $< 5$ Hz]  
887 frequencies, x-axis). Each dot marks a single 4s data epoch. Red, wakefulness; Green, REM; Blue,  
888 NREM. Wake is associated with high-frequency EEG activity and high muscle tone, NREM is  
889 associated with low-frequency EEG activity and low muscle tone, and REM is associated with high-  
890 frequency activity and low muscle tone. Embedded pie chart (top left) shows average time spent in each  
891 state across the entire data (n=12 mice). (E) Average ACCp claustrum calcium activity in REM, wake,

892 and NREM (n=6). **(F)** Normalized EEG power (% of total power, y-axis) as a function of frequency  
893 (Hz, x-axis) in each state as a function of ACCp claustrum activity (quartiles, n=6). Left, REM (green);  
894 Middle, wake (red); Right, NREM (blue). Insets (top right corner) show SWA-to-theta ratios (y-axis)  
895 for each ACCp activation quartile (x-axis; from minimal to maximal) in each animal separately (n=6).  
896 Mean ratios are depicted as a black line, and individual animals as dashed lines. **(G)** Representative  
897 traces of EEG (top - frontal and parietal), EMG (middle), and ACCp GCaMP (bottom) in auditory  
898 stimulation trials associated with maintained sleep (left) vs. awakening (right). Purple vertical bars mark  
899 intervals of 1s tone-pip presentation (Methods). Scale bars as in C. **(H)** ACCp baseline activity (y-axis)  
900 for trials associated with maintained sleep (left) vs. awakening (right). Each dot represents a separate  
901 ~10h experiment (11 experiments in n=6 mice). Unless noted otherwise, data are mean  $\pm$  s.e.m.  
902 \* $p < 0.05$ , \*\* $p < 0.01$ , \*\*\* $p < 0.001$ ; n.s., not significant. See Supplementary Table 3 for further details  
903 of the statistical analyses.

904 **Figure S1. Increased ACCp activity is associated with reduced engagement during behavior and**  
905 **in sleep.** Optimal ‘in the zone’ performance requires a defined, moderate, level of ACCp activity  
906 (Figures 2-4). At low ACCp activity levels, mice tend to perform impulse errors in the response to the  
907 trial onset BBN, rather than withhold their response in anticipation of the ‘go’ cue. At high ACCp  
908 activity levels, mice tend to ‘zone out’ and miss trials. Furthermore, even higher levels of ACCp activity  
909 are associated with ‘miss streaks’, in which the mice do not engage with the task over multiple minutes.  
910 Finally, during sleep, cortical slow-wave EEG is correlated with increased ACCp activity, and the  
911 propensity of mice to awake from NREM sleep following tone stimulations decreases as a function of  
912 ACCp activity (Figure 5).

913 **Figure S2. Anatomical distinction of ACCp and OFCp claustral populations.** **(A)** Differential  
914 localization of claustral ACCp and OFCp networks (labeled by retro-labeling ACC- vs OFC- projecting  
915 cells with cytoplasmic tdTomato vs eGFP expression) in several planes along the anterior-posterior  
916 claustrum axis. Scale bar represents 100 $\mu$ m. **(B)** Quantification of overlap (percent of all labelled cells)  
917 using nuclear-localized (H2B-fused; top) or cytoplasmically-diffuse (bottom) expression of  
918 fluorophores driven by retro-AAVs co-injected to the same cortical target vs. different cortical regions.  
919 **(C)** Data overlaid from 7 mice showing spread of ACCp and OFCp neurons (top panels) and their  
920 respective density distributions along the dorso-ventral (DV; middle panels) or medio-lateral (ML;  
921 lower panels) axes of the claustrum. **(D)** Localization of ACCp neurons in the claustrum core, identified  
922 by parvalbumin (PV) immunostaining, vs relatively sparse distribution of OFCp network signal within  
923 this ‘core’ patch. **(E)** Quantification of axonal intensity by brain region for ACCp or OFCp neurons  
924 following anti-GFP immunostaining (expanded data from Figure 1E, see methods). Glossary: MO –  
925 Medial orbital cortex; IL – Infralimbic cortex; rVO\LO – ventral orbital cortex, rostral; AO – Anterior  
926 olfactory nucleus; rACC – Anterior cingulate cortex, rostral, cVO\LO – Orbitofrontal cortex, caudal;  
927 M1/2 – Motor cortex; mACC – Anterior cingulate cortex, middle; SS – Somatosensory cortex; STR –  
928 Striatum; cACC – Anterior cingulate cortex, caudal; AMY – amygdala; ENT – entorhinal cortex; AUD  
929 – Auditory cortex; RSP – Retrosplenial cortex; VIS – Visual cortex. Data in Figure 1E shows averaged  
930 axonal density in ACC (r, m, and c), OFC (r and c VO\LO), and sensory cortex (AUD, RSP and VIS).

931 **Figure S3. Performance metrics during automated behavioral training.** **(A)** Overall success rate  
932 during automated training. Points represent performance in the first and last quartiles of each stage.  
933 Black lines represent group averages. Training stages proceed from lick adaptation (cue initiated upon  
934 port entry; 1.5 second reward window; all trials include visual aid - AudVis); Stage 2: addition of delay  
935 prior to cue (random delay of 0.5-2 sec); Stage 3: lengthened delay (0.75-3s) and gradual increase in  
936 difficulty by removal of visual aid in three steps, 30% (Stage 3a), 50% (Stage 3b), and 70% (stage 3c)  
937 trials are purely auditory (Aud). In stage 4 a tone-cloud distractor was added. Stage 4a comprised of  
938 70% auditory-visual trials with the cloud (AudVisCloud). Stage 4b included 50% AudVisCloud trials,  
939 20% auditory cloud trials (AudCloud), 15% Aud trials and 15% AudVis trials. After mice were familiar  
940 with the cloud in both visual and non-visual trials, we proceeded to stage 4c, and increased the rate of

941 AudCloud trials to 65%, while the rest of the trials comprised of 15% AudVisCloud, 15% Aud, and 5%  
942 AudVis. Finally, in stage 5, 3 additional attenuations of the target cue were introduced. In stage 5a to  
943 30% of the trials, in stage 5b to 50% of the trials, and in stage 5c to 100% percent of the trials (success  
944 rate in the full task during training is shown in Figure 2C). (B) As in A, for hit rate (excluding impulsive  
945 trials). Right panel summarizes the hit rate in the full task during training compared to the head-fixed  
946 recordings. The increase in missed trials reflects the change from a self-paced task to a constant 20  
947 second inter-trial interval. (C) As in A, B for impulsive errors, which were far less prominent during  
948 head-fixed recordings (potentially reflecting reduced competition for the port compared to the group-  
949 housed automated training). (D) Daily reward consumption during training stages. (E) Number of trials  
950 in each stage. Box plots in (D) and (E) represent group median and 1st and 3rd quartiles. Dots represent  
951 individual mice. Unless noted otherwise, data are mean  $\pm$  s.e.m. \* $p < 0.05$ , \*\* $p < 0.01$ , \*\*\* $p < 0.001$ ;  
952 n.s., not significant. See Supplementary Table 3 for further details of the statistical analyses.

953 **Figure S4. OFCp activity is recruited following licks and cues but not trial onset.** Top: All OFCp  
954 trials for impulsive (A,  $n=5,835$ ), hit (B,  $n=15,409$ ), and miss (C,  $n=12,815$ ) trials from  $n=10$  mice,  
955 sorted according to lick onset (impulsive); delay from trial onset to cue (hits); or cue intensity (miss).  
956 Red and green ticks indicate the first impulsive or correct lick within the trial, respectively. Bottom:  
957 mean activity traces in impulsive (left) hit (middle) and miss trials (right, separated by cue intensity).  
958 Shaded area represents SEM. The vertical black line indicates trial onset (for impulsive & hit trials) or  
959 cue (for miss trials).

960 **Figure S5. A linear encoding model for quantification of the claustral representation of task**  
961 **parameters** Time-event kernels (A) are linearly summed to generate a prediction for the average neural  
962 signal (B). See Figure 2 and supplementary table T2 for the full list of labels. (C) Model quantification  
963 of the unique contribution of claustrum activity during spontaneous locomotion events (ACCp  $n=20$ ;  
964 OFCp  $n=10$ ). Data is shown as individual channels and bootstrapped distribution of means with 95%  
965 confidence intervals. (D-E) Model quantification of the unique contribution of claustrum activity during  
966 licking events (D) and go-cue stimuli (E) in ACCp and OFCp signals. Unless noted otherwise, data are  
967 mean  $\pm$  s.e.m. \* $p < 0.05$ , \*\* $p < 0.01$ , \*\*\* $p < 0.001$ ; n.s., not significant. See Supplementary Table 3 for  
968 further details of the statistical analyses.

969 **Figure S6. OFCp pre-trial activity is not correlated with performance.** (A) Mean activity of all  
970 OFCp claustrum recordings ( $n=10$ ) aligned to trial onset, divided by trial outcome. Inset depicts 5  
971 seconds of pre-trial activity. (B) OFCp pre-trial baseline activity in impulsive trials (red) and miss trials  
972 (gray), depicted as individual mice and bootstrapped distribution of means with 95% confidence  
973 intervals ( $n=10$ ). (C) Response time in hits as a function of ACCp pre-trial activity ( $n=20$ ). (D)  
974 Response time in ACCp mice ( $n=20$ ) is uncorrelated with pre-trial activity. Thick line represents linear  
975 fit, dotted lines represent 95% confidence intervals. Unless noted otherwise, data are mean  $\pm$  s.e.m.  
976 \* $p < 0.05$ , \*\* $p < 0.01$ , \*\*\* $p < 0.001$ ; n.s., not significant. See Supplementary Table 3 for further details  
977 of the statistical analyses.

978 **Figure S7. The effect of ACCp chemogenetic activation is specific, and does not affect transient**  
979 **responses to task events, while enhancing consecutive misses late in the session.** (A) Expression of  
980 GcAMP6s (green) and hM3Dq (red) in ACCp neurons. (B) CNO had no effect on impulsive errors in  
981 GCAMP6s control mice ( $n=3$ ). (C) Model quantification of the contribution of behavioral events to  
982 claustrum photometry signals in saline (left) or CNO (right) sessions ( $n=5$  mice, 3 sessions of each  
983 condition per mouse). (D) Success rates of ACCp-hM3Dq expressing mice throughout the experiment  
984 were not affected by CNO. (E) Response time in hit trials throughout the experiment were not affected  
985 by CNO. Boxes in (D, E) represent group median and 1st and 3rd quartiles, session order as in Figure  
986 3D. (F) Cumulative probability distribution of consecutive miss trials in saline (turquoise) and CNO  
987 (gray) sessions. Unless noted otherwise, data are mean  $\pm$  s.e.m. \* $p < 0.05$ , \*\* $p < 0.01$ , \*\*\* $p < 0.001$ ;  
988 n.s., not significant. See Supplementary Table 3 for further details of the statistical analyses.

989 **Figure S8. Erratic mice exhibit an overall lower success rate, and increased reaction time prior**  
990 **to miss streaks.** (A) Overall success rate in the task by strategy group (n = 5 selective; 6 consistent; 14  
991 erratic). (B) No relation of reaction time in hit trials to strategy group. (C) Mean response time in  
992 impulsive errors (Figure 4E) as a function of the model quantification for trial onset ACCp activity  
993 (Figure 4F). Colors represent strategy group (n = 3 selective; 4 consistent; 13 erratic). Thick line  
994 represents linear fit, dotted lines represent 95% confidence intervals. (D) Response time for erratic  
995 ACCp mice (n=13) is increased in hit trials immediately preceding miss streaks, compared to all hit  
996 trials. Unless noted otherwise, data are mean  $\pm$  s.e.m. \* $p < 0.05$ , \*\* $p < 0.01$ , \*\*\* $p < 0.001$ ; n.s., not  
997 significant. See Supplementary Table 3 for further details of the statistical analyses.

998 **Figure S9. Claustral inputs from auditory cortex acquire task-dependent correlations with**  
999 **ACCp.** (A) Strategy for simultaneous recording from claustrum ACCp neurons expressing jRGECO1a,  
1000 together with activity of claustrum afferents from ACC (ACCi; top) or AUD (AUDi; bottom) axons,  
1001 using axonal-targeted GCaMP6s. (B) Average autocorrelations of ACCi/ACCp or AUDi/ACCp  
1002 spontaneous activity, and respective cross-correlations between channels (n=3 mice in each group). (C)  
1003 Average autocorrelations of ACCp/OFCp (left), ACCi/ACCp (middle) or AUDi/ACCp (right) activity  
1004 during task recordings, as well as cross-correlations between channels (n = 5, 3, 3 mice, respectively).  
1005 (D) Summary of overall correlations between channel activity during free recordings (spontaneous)  
1006 compared to those recorded during the task (n=5, 3, 3 mice for each group), demonstrating an increase  
1007 in correlated activity between AUDi and ACCp networks during the task. Gray dots represent the  
1008 maximal correlation of shuffled data over 1000 iterations per mouse, averaged across mice. (E-G)  
1009 Model quantification of ACC (ACCi) and auditory (AUDi) cortical inputs to the claustrum. (E-F)  
1010 Quantification of the contribution of activity during licking events (E) and go cue stimuli (F) to the  
1011 overall signal. (G) Average trace from all axonal recordings in ACCi (green) vs AUDi (gray), aligned  
1012 to trial onset, depicting trial onset responses in AUDi, and their absence in ACCi activity. (H-K) Pre-  
1013 trial activity dynamics. (H) Correlation of average pre-trial activity (5s preceding trial onset) in  
1014 representative co-recorded ACCp/OFCp (left), ACCp/ACCi (middle), or ACCp/AUDI (right) channels.  
1015 Inset depicts cross-correlation in a window spanning 400 trials. Bottom panel depicts the magnitudes  
1016 of pre-trial ACCp activity and corresponding OFCp, ACCi or AUDi activity during individual  
1017 consecutive trials in a representative session. (I) Coefficient of determination (R-squared) of the linear  
1018 fit between pre-trial activity (5s prior to trial onset) in co-recorded channels. (J) Frequency of ultra-  
1019 slow oscillations of pre-trial activity in ACCp (n=20), OFCp (n=10), ACCi (n=3) and AUDi (n=3)  
1020 recordings. Oscillation frequency was defined as the peak of the frequency spectrum emerging above a  
1021 threshold obtained from 1000 shuffles of the data (see Methods). (K) Division of pre-trial ultra-slow  
1022 fluctuations in ACCp mice according to strategy (see **Figure 4**). Arrow points to mice with no  
1023 significant oscillation, all associated with the erratic group. Unless noted otherwise, data are mean  $\pm$   
1024 s.e.m. \* $p < 0.05$ , \*\* $p < 0.01$ , \*\*\* $p < 0.001$ ; n.s., not significant. See Supplementary Table 3 for further  
1025 details of the statistical analyses.

1026 **Figure S10. Claustral OFCp activity during sleep.** (A) Average OFCp claustrum calcium activity in  
1027 REM sleep, wake, and NREM sleep (n=6). Note that in this population, activity during NREM sleep is  
1028 not higher than in wakefulness. (B) OFCp baseline activity (y-axis) for trials associated with maintained  
1029 sleep (left) vs. awakening (right). Each dot represents a separate ~10h experiment (10 experiments in  
1030 n=6 mice). Unless noted otherwise, data are mean  $\pm$  s.e.m. \* $p < 0.05$ , \*\* $p < 0.01$ , \*\*\* $p < 0.001$ ; n.s., not  
1031 significant. See Supplementary Table 3 for further details of the statistical analyses.

Supplementary Table T3. Statistical Analysis

| Figure           | Mice, groups, and group sizes                                                                                                                                                                                 | Statistical analysis                                                                                                              |
|------------------|---------------------------------------------------------------------------------------------------------------------------------------------------------------------------------------------------------------|-----------------------------------------------------------------------------------------------------------------------------------|
| <b>Figure 1E</b> | <b>n = 4 ACCp mice, 3 OFCp mice</b>                                                                                                                                                                           | <b>two-sample ttest (n=3 acc sections per mouse, 2 ofc sections per mouse, 3 sensory sections per mouse)</b>                      |
|                  | ACC                                                                                                                                                                                                           | t(19) = 3.8522, p = 0.0011                                                                                                        |
|                  | OFC                                                                                                                                                                                                           | t(12) = -2.6482, p = 0.0212                                                                                                       |
|                  | Sensory areas (AUD, VIS, RSP)                                                                                                                                                                                 | t(19) = 4.0728, p = 6.4876e-04                                                                                                    |
| <b>Figure 1G</b> | <b>n = 5 ACCp mice, 5 OFCp mice</b>                                                                                                                                                                           | <b>two-sample ttest</b>                                                                                                           |
|                  | Frequency                                                                                                                                                                                                     | t(8) = 2.6869, p = 0.0276                                                                                                         |
|                  | Width (half prominenece)                                                                                                                                                                                      | t(8) = -4.0218, p = 0.0038                                                                                                        |
|                  | Amplitude                                                                                                                                                                                                     | t(8) = -1.6791, p = 0.1317                                                                                                        |
|                  | MAD                                                                                                                                                                                                           | t(8) = 0.7272, p = 0.84                                                                                                           |
| <b>Figure 1J</b> | <b>n = 5 mice</b>                                                                                                                                                                                             | <b>Permutation test over maximum of 1000 shuffles of the data</b>                                                                 |
|                  | Data vs. maximum over 1000 shuffles                                                                                                                                                                           | P < 0.000001 (0/1000 of data shuffles had equal or greater correlations)                                                          |
| <b>Figure 2C</b> | <b>n = 22 mice (we recorded from two hemispheres of one of the mice, which is counted only once for training, and two mice are excluded from this presentation, as their training differed - see methods)</b> | <b>Paired ttest (training vs rig)</b>                                                                                             |
|                  | % Success rate (hits / (impulsive+miss+hit))                                                                                                                                                                  | t(18) = 0.2677 p = 0.7919                                                                                                         |
|                  | Bayes Factor ttest                                                                                                                                                                                            | BF01 = 4.34, providing moderate evidence for accepting H0                                                                         |
| <b>Figure 2E</b> | <b>n = 25 mice</b>                                                                                                                                                                                            | <b>Paired ttest (cloud vs no cloud)</b>                                                                                           |
|                  | % impulsive errors                                                                                                                                                                                            | t(24) = 5.5831, p < 0.00001                                                                                                       |
| <b>Figure 2K</b> | <b>n = 20 ACCp channels, 10 OFCp channels</b>                                                                                                                                                                 | <b>Wilcoxon rank sum test (ACCp vs OFCp)</b>                                                                                      |
|                  | Trial onset (BBN) UC ACCp vs OFCp (trials in which Lick time <1s are excluded)                                                                                                                                | med ACC (-0.073), mdian OFC (0.0048), diff(-0.078), Z(-2.3537) p = 0.0186                                                         |
|                  | ACCp BBN UC permutation test (n = 5000)                                                                                                                                                                       | p < 0.00001 (0/5000 >= 0)                                                                                                         |
|                  | OFCp BBN UC permuation test( n= 5000)                                                                                                                                                                         | p = 0.99 (4999/5000 >= 0)                                                                                                         |
| <b>Figure 2M</b> | <b>n = 20 ACCp channels</b>                                                                                                                                                                                   | <b>Permutation test on bootstrapped distribution of pre-trial activity</b>                                                        |
|                  | impulsive error (n = 5000)                                                                                                                                                                                    | p = 0.0018 (9/5000 >= 0)                                                                                                          |
|                  | miss (n = 5000)                                                                                                                                                                                               | p = 0.111 (555/5000 <= 0)                                                                                                         |
| <b>Figure 2N</b> | <b>n = 20 ACCp channels</b>                                                                                                                                                                                   | <b>Simple linear regression</b>                                                                                                   |
|                  | impulsive error rate vs pre trial activity                                                                                                                                                                    | p< 0.00001, Rsq = 0.63                                                                                                            |
| <b>Figure 2O</b> | <b>n = 20 ACCp channels</b>                                                                                                                                                                                   | <b>Simple linear regression</b>                                                                                                   |
|                  | miss rate vs pre trial activity                                                                                                                                                                               | p= 0.007, Rsq = 0.23                                                                                                              |
| <b>Figure 2P</b> | <b>n = 10 OFCp channels</b>                                                                                                                                                                                   | <b>Simple linear regression</b>                                                                                                   |
|                  | impulsive error rate vs pre trial activity                                                                                                                                                                    | p=0.162, Rsq = 0.07                                                                                                               |
| <b>Figure 2Q</b> | <b>n = 10 OFCp channels</b>                                                                                                                                                                                   | <b>Simple linear regression</b>                                                                                                   |
|                  | miss rate vs pre trial activity                                                                                                                                                                               | p=0.737, Rsq < 0.01                                                                                                               |
| <b>Figure 3C</b> | <b>n = 5mice</b>                                                                                                                                                                                              | <b>Wilcoxon paired signed rank test (one-tailed)</b>                                                                              |
|                  | Averaged DFF saline vs CNO                                                                                                                                                                                    | median diff (0.1882), p = 0.0313 Z = 1.5230                                                                                       |
| <b>Figure 3D</b> | <b>n = 5mice</b>                                                                                                                                                                                              | <b>ANOVA on Linear mixed effects model (impulse~treatment*repetition + 1 mouse) followed post hoc one sided two sample ttests</b> |
|                  | ANOVA effect of treatment (Saline/CNO)                                                                                                                                                                        | p = 0.0052                                                                                                                        |
|                  | ANOVA effect of repetition (1-3)                                                                                                                                                                              | p = 0.0061                                                                                                                        |
|                  | ANOVA interaction between treatment and repetition                                                                                                                                                            | p = 0.302                                                                                                                         |
|                  | two sample ttest Saline day 1 vs CNO day 1                                                                                                                                                                    | t(8) = -3.4356, p = 0.0044                                                                                                        |
|                  | two sample ttest Saline day 2 vs CNO day 2                                                                                                                                                                    | t(8) = -3.6415, p = 0.0033                                                                                                        |
|                  | two sample ttest Saline day 3 vs CNO day 3                                                                                                                                                                    | t(8) = -2.5331, p = 0.0175                                                                                                        |
| <b>Figure 4C</b> | <b>n = 5,6,14 in each group (selective, consistent, erratic)</b>                                                                                                                                              | <b>ANOVA on Linear mixed effects model (FA~cloud*group + (1 mouse)) followed post hoc Post hoc paired ttest.</b>                  |
|                  | ANOVA effect of cloud                                                                                                                                                                                         | p=0.288                                                                                                                           |
|                  | ANOVA effect of group                                                                                                                                                                                         | p=0.473                                                                                                                           |
|                  | ANOVA interaction between group and cloud                                                                                                                                                                     | p = 0.00115                                                                                                                       |
|                  | paired t-test for erratic group cloud vs no cloud                                                                                                                                                             | t(13)= 6.18, p = 3.3088e-05                                                                                                       |
| <b>Figure 4D</b> | <b>impulsive errors in each group (selective, n=1915, consistent, n=3487, erratic, n=10454)</b>                                                                                                               | <b>Two-sample Kolmogorov-Smirnov test</b>                                                                                         |
|                  | selective vs consistent                                                                                                                                                                                       | p < 0.00001 (D = 0.1275)                                                                                                          |
|                  | selective vs erratic                                                                                                                                                                                          | p < 0.00001 (D = 0.3121)                                                                                                          |
|                  | erratic vs consistent                                                                                                                                                                                         | p < 0.00001 (D = 0.195)                                                                                                           |
| <b>Figure 4E</b> | <b>n = 3, 4, 13 ACCp mice from each group</b>                                                                                                                                                                 | <b>kruskalwallis ANOVA on BBN UC by group followed by post-hoc permutation tests on bootstrapped distributions</b>                |
|                  | erratic vs consistent vs selective                                                                                                                                                                            | Chi-sq(2) = 10.46, p = 0.0053                                                                                                     |
|                  | selective UC BBN permutation test (n = 5000)                                                                                                                                                                  | p = 1 (5000/5000 >= 0)                                                                                                            |
|                  | consistent UC BBN permutation test (n = 5000)                                                                                                                                                                 | p = 1 (5000/5000 >= 0)                                                                                                            |
|                  | erratic UC BBN permutation test (n = 5000)                                                                                                                                                                    | p < 0.00001 (0/5000 >= 0)                                                                                                         |
| <b>Figure 4G</b> | <b>n = 13 ACCp channels</b>                                                                                                                                                                                   | <b>Permutation test on bootstrapped distribution of pre-trial activity</b>                                                        |
|                  | impulsive error (n = 5000)                                                                                                                                                                                    | p = 0.0048 (24/5000 >= 0)                                                                                                         |
|                  | miss (n = 5000)                                                                                                                                                                                               | p = 0.0252 (126/5000 <= 0)                                                                                                        |
| <b>Figure 4H</b> | <b>n = 13 ACCp channels</b>                                                                                                                                                                                   | <b>Simple linear regression</b>                                                                                                   |
|                  | impulsive error rate vs pre trial activity                                                                                                                                                                    | p< 0.00001, Rsq = 0.62                                                                                                            |
| <b>Figure 4I</b> | <b>n = 13 ACCp channels</b>                                                                                                                                                                                   | <b>Simple linear regression</b>                                                                                                   |
|                  | miss rate vs pre trial activity                                                                                                                                                                               | p = 0.00016, Rsq = 0.40                                                                                                           |
| <b>Figure 4J</b> | <b>n = 3, 4, 13 ACCp mice from each group</b>                                                                                                                                                                 | <b>Two-sample Kolmogorov-Smirnov test</b>                                                                                         |
|                  | Distribution of consecutive missed selective vs erratic                                                                                                                                                       | p < 0.00001 (D = 0.0906)                                                                                                          |
|                  | Distribution of consecutive missed consistent vs erratic                                                                                                                                                      | p < 0.00001 (D = 0.113)                                                                                                           |

|                             |                                                                         |                                                                                                                                                                                                            |
|-----------------------------|-------------------------------------------------------------------------|------------------------------------------------------------------------------------------------------------------------------------------------------------------------------------------------------------|
|                             | Distribution of consecutive missed consistent vs selective              | p = 0.35 (D = 0.0441)                                                                                                                                                                                      |
| <b>Figure 5E</b>            | <b>n = 6 ACCp mice</b>                                                  | <b>Friedman's test</b>                                                                                                                                                                                     |
|                             | ACCp activity in REM, wake and NREM sleep                               | chi-square(2) = 9.33, p = 0.0094                                                                                                                                                                           |
| <b>Figure 5F</b>            | <b>n = 6 ACCp mice</b>                                                  | <b>ANOVA on Linear mixed effects model (ACCp activity~SWA to theta ratio by quartile + (1 mouse))</b>                                                                                                      |
|                             | REM                                                                     | p = 5.7935e-06                                                                                                                                                                                             |
|                             | Wake                                                                    | p = 0.00014038                                                                                                                                                                                             |
|                             | NREM                                                                    | p = 1.5772e-05                                                                                                                                                                                             |
| <b>Figure 5H</b>            | <b>n = 6 ACCp mice</b>                                                  | <b>Wilcoxon paired signed rank test</b>                                                                                                                                                                    |
|                             | baseline before awakening vs. non awakening trials                      | p = 0.032                                                                                                                                                                                                  |
| <b>Supplemental figures</b> |                                                                         |                                                                                                                                                                                                            |
| <b>Figure S3</b>            | <b>n = 22 mice</b>                                                      | <b>Wilcoxon paired signed rank test (training vs rig)</b>                                                                                                                                                  |
|                             | B - Final task vs rig hit rate (hit/hit+miss)                           | t(18) = 8.7878, p < 0.0001                                                                                                                                                                                 |
|                             | C - Final task vs rig impulsive error rate (impulse/(hit+impulse+miss)) | t(18) = 7.9576, p < 0.0001                                                                                                                                                                                 |
| <b>Figure S5C</b>           | <b>n = 20 ACCp channels, 10 OFCp channels</b>                           | <b>Wilcoxon rank sum test (ACCp vs OFCp) and permutation tests on bootstrapped distribution of means</b>                                                                                                   |
|                             | Locomotion ACCp vs OFCp                                                 | med ACC (-0.0662), median OFC (-0.0670), diff(8.1686e-04), p = 0.4953 Z=0.4822                                                                                                                             |
|                             | ACCp locomotion UC permutation test (n = 5000)                          | p < 0.00001 (0/5000 >= 0)                                                                                                                                                                                  |
|                             | OFCp locomotion UC permutation test( n= 5000)                           | p < 0.00001 (0/5000 >= 0)                                                                                                                                                                                  |
| <b>Figure S5D</b>           | <b>n = 20 ACCp channels, 10 OFCp channels</b>                           | <b>Linear mixed effects model with licking unique contribution as the dependent variable and lick type (rewarded, unrewarded, spontaneous) as an independent variable, with a random effect for mouse.</b> |
|                             | Lick ACCp vs OFCp                                                       | med ACC (-0.1089), median OFC (-0.1371), diff( 0.0282), p = 0.81                                                                                                                                           |
|                             | ACCp lick type effect ANOVA                                             | Wilcoxon rank sum test Z=0.17                                                                                                                                                                              |
|                             | OFCp lick type effect ANOVA                                             | p = 0.00108 ACC                                                                                                                                                                                            |
|                             |                                                                         | p = 0.0003 OFC                                                                                                                                                                                             |
| <b>Figure S5E</b>           | <b>n = 20 ACCp channels, 10 OFCp channels</b>                           | <b>Linear mixed effects model with cue unique contribution as the dependent variable and cue intensity as an independent variable, with a random effect for mouse.</b>                                     |
|                             | Cue ACCp vs OFCp                                                        | med ACC (-0.0070), median OFC (-0.0015), diff(-0.0055), p = 0.3959                                                                                                                                         |
|                             | ACCp cue intensity effect ANOVA                                         | Wilcoxon rank sum test Z=0.6                                                                                                                                                                               |
|                             | OFCp cue intensity effect ANOVA                                         | p = 0.19815 ACC                                                                                                                                                                                            |
|                             |                                                                         | p = 0.118 OFC                                                                                                                                                                                              |
| <b>Figure S6B</b>           | <b>n = 10 OFCp channels</b>                                             | <b>Permutation test on bootstrapped distribution of pre-trial activity</b>                                                                                                                                 |
|                             | impulsive error (n = 5000)                                              | p = 0.0648 (324/5000 >= 0)                                                                                                                                                                                 |
|                             | miss (n = 5000)                                                         | p = 0.0592 (296/5000 <= 0)                                                                                                                                                                                 |
| <b>Figure S6D</b>           | <b>n = 20 ACCp channels</b>                                             | <b>Simple linear regression</b>                                                                                                                                                                            |
|                             | RT in hits vs pre trial activity                                        | p=0.96, Rsq < 0.01                                                                                                                                                                                         |
| <b>Figure S7B</b>           | <b>n = 3 mice</b>                                                       | <b>Paired ttest</b>                                                                                                                                                                                        |
|                             | Impulsive error rate saline vs CNO                                      | T(2)=1.78, p=0.108, one-tailed paired ttest                                                                                                                                                                |
| <b>Figure S7C</b>           | <b>n = 5 mice</b>                                                       | <b>Paired ttest</b>                                                                                                                                                                                        |
|                             | paired ttests over mice for each label (SVM, UC)                        | SVM p = 0.777 0.437 0.478 0.387 0.315 0.0985 0.344 0.2603 0.4388<br>0.386 0.987 0.4317 0.918 0.1453 0.799; UC p = 0.524 0.718 0.9 0.875<br>0.524 0.25 0.174 0.262 0.294 0.29 0.295 0.938 0.314 0.197 0.385 |
| <b>Figure S7D</b>           | <b>n = 5 mice</b>                                                       | <b>ANOVA on Linear mixed effects model (Success rate~treatment*repetition + 1 mouse)</b>                                                                                                                   |
|                             | ANOVA effect of treatment                                               | p = 0.414                                                                                                                                                                                                  |
|                             | ANOVA effect of repetition                                              | p = 0.29                                                                                                                                                                                                   |
| <b>Figure S7E</b>           | <b>n = 5 mice</b>                                                       | <b>ANOVA on Linear mixed effects model (hit RT~treatment*repetition + 1 mouse)</b>                                                                                                                         |
|                             | ANOVA effect of treatment                                               | p = 0.38                                                                                                                                                                                                   |
|                             | ANOVA effect of repetition                                              | p = 0.81                                                                                                                                                                                                   |
| <b>Figure S7F</b>           | <b>n = 5 mice</b>                                                       | <b>Two-sample Kolmogorov-Smirnov test</b>                                                                                                                                                                  |
|                             | Distribution of consecutive missed saline vs CNO days                   | p = 0.0485 (D = 0.1428)                                                                                                                                                                                    |
| <b>Figure S8A</b>           | <b>n = 5,6,14 in each group (selective, consistent, erratic)</b>        | <b>kruskalwallis ANOVA on %SR between groups followed by post-hoc two-sample t-tests</b>                                                                                                                   |
|                             | Main effect of ANOVA by group                                           | Chi-sq(2) = 7.9, p = 0.0192                                                                                                                                                                                |
|                             | selective vs consistent                                                 | t(9) = -1.8981 p = 0.09                                                                                                                                                                                    |
|                             | selective vs erratic                                                    | t(17) = 1.3281 p = 0.2017                                                                                                                                                                                  |
|                             | erratic vs consistent                                                   | t(18) = 3.1197 p = 0.0059                                                                                                                                                                                  |
| <b>Figure S8B</b>           | <b>n = 5,6,14 in each group (selective, consistent, erratic)</b>        | <b>kruskalwallis ANOVA on RT in hits between groups</b>                                                                                                                                                    |
|                             | Main effect of ANOVA by group                                           | Chi-sq(2) = 5.87, p = 0.0532                                                                                                                                                                               |
| <b>Figure S8C</b>           | <b>n = 3,4,13 in each group (ACCp selective, consistent, erratic)</b>   | <b>Simple linear regression</b>                                                                                                                                                                            |
|                             | ACCp BBN UC (absolute value) vs RT in impulsive licks by group          | p<0.01, R-squared = 0.33                                                                                                                                                                                   |
| <b>Figure S8D</b>           | <b>n = 13 ACCp erratic mice</b>                                         | <b>Paired ttest</b>                                                                                                                                                                                        |
|                             | general hit RT vs hit RT in 5 trials preceding streak                   | t(12) = -7.8350, p = 4.6513e-06                                                                                                                                                                            |
| <b>Figure S9D</b>           | <b>n = 5,3,3 in each group (OFCp/ACCi/AUDI with ACCp)</b>               | <b>paired ttest free vs task correlation</b>                                                                                                                                                               |
|                             | All correlations were significant vs 1000 data shuffles                 | P < 0.000001 (0/1000 of data shuffles had equal or greater correlations)                                                                                                                                   |
|                             | OFCp/ACCp                                                               | t(4) = -0.0972, p = 0.9272, paired ttest free vs task correlations                                                                                                                                         |
|                             | ACCi/ACCp                                                               | t(2) = -1.8665, p = 0.203 paired ttest free vs task correlation                                                                                                                                            |
|                             | AUDI/ACCp                                                               | t(2) = -5.8835, p = 0.0277 paired ttest free vs task correlation                                                                                                                                           |
| <b>Figure S9E</b>           | <b>n = 3 ACCi channels, 3 AUDi channels</b>                             | <b>Linear mixed effects model with licking unique contribution as the dependent variable and lick type (rewarded, unrewarded, spontaneous) as an independent variable, with a random effect for mouse.</b> |
|                             | Lick ACCi vs AUDi                                                       | med ACC (-0.0650), mdian OFC (-0.0864), diff(0.0214), p = 0.86                                                                                                                                             |
|                             | ACCi lick type effect ANOVA                                             | Wilcoxon rank sum test Z=0.125                                                                                                                                                                             |
|                             |                                                                         | ACCi p = 0.0204                                                                                                                                                                                            |

|                    |                                                                                |                                                                                                                                                                        |
|--------------------|--------------------------------------------------------------------------------|------------------------------------------------------------------------------------------------------------------------------------------------------------------------|
|                    | AUDi lick type effect ANOVA                                                    | AUDi p= 0.0343                                                                                                                                                         |
| <b>Figure S9F</b>  | <b>n = 3 ACCi channels, 3 AUDi channels</b>                                    | <b>Linear mixed effects model with cue unique contribution as the dependent variable and cue intensity as an independent variable, with a random effect for mouse.</b> |
|                    | Cue ACCi vs AUDi                                                               | med ACC (-0.1206), mdian OFC (-0.0038), diff( 0.1168), p = 0.069<br>Wilcoxon rank sum test Z = 1.2858                                                                  |
|                    | ACCi cue intensity effect ANOVA                                                | p = 0.0215 ACCi                                                                                                                                                        |
|                    | AUDi cue intensity effect ANOVA                                                | p = 0.0879 AUDi                                                                                                                                                        |
| <b>Figure S9I</b>  | <b>n = 5,3,3 in each group (OFCp/ACCi/AUDi with ACCp)</b>                      | <b>Simple linear regression</b>                                                                                                                                        |
|                    | ACCp vs OFCp trial-by-trial baseline activity (5 seconds prior to trial onset) | p<0.0001, R-squared = 0.03                                                                                                                                             |
|                    | ACCi vs ACCp trial-by-trial baseline activity (5 seconds prior to trial onset) | p<0.0001, R-Squared = 0.01                                                                                                                                             |
|                    | AUDi vs ACCp trial-by-trial baseline activity (5 seconds prior to trial onset) | p<0.0001, R-squared = 0.7                                                                                                                                              |
| <b>Figure S9J</b>  | <b>n = 5,3,3 in each group (OFCp/ACCi/AUDi with ACCp)</b>                      | <b>kruskalwallis ANOVA on Rsq between groups</b>                                                                                                                       |
|                    | Main effect of ANOVA by group                                                  | Chi-sq(2) = 6.81, p = 0.033                                                                                                                                            |
| <b>Figure S10A</b> | <b>n = 6 OFCp mice</b>                                                         | <b>Freidman's test</b>                                                                                                                                                 |
|                    | OFC activity in REM, wake and NREM sleep                                       | chi-square(1) = 9.33, p = 0.0094                                                                                                                                       |
| <b>Figure S10B</b> | <b>n = 6 OFCp mice</b>                                                         | <b>Wilcoxon paired signed rank test</b>                                                                                                                                |
|                    | baseline before awakening vs. non awakening trials                             | p = 0.922                                                                                                                                                              |
